1 **On the contingent nature of satellite DNA evolution**

2

3 **Juan Pedro M. Camacho<sup>1</sup>, Josefa Cabrero<sup>1</sup>, María Dolores López-León<sup>1</sup>, María**

4 **Martín-Peciña<sup>1</sup>, Francisco Perfectti<sup>1</sup>, Manuel A. Garrido-Ramos<sup>1</sup>, Francisco J.**

5 **Ruiz-Ruano<sup>2,3,\*</sup>**

6

7 <sup>1</sup>Departamento de Genética, Universidad de Granada, 18071, Granada, Spain

8 <sup>2</sup>Department of Organismal Biology – Systematic Biology, Evolutionary Biology

9 Centre, Uppsala University, SE-752 36, Uppsala, Sweden

10 <sup>3</sup>School of Biological Sciences, University of East Anglia, Norwich Research Park,

11 Norwich, NR4 7TU, UK

12

13 \*Corresponding author: Francisco J. Ruiz-Ruano ([francisco.ruiz-ruano@ebc.uu.se](mailto:francisco.ruiz-ruano@ebc.uu.se),

14 [f.ruiz-ruano-campana@uea.ac.uk](mailto:f.ruiz-ruano-campana@uea.ac.uk))

15

16

17

18

19

20

21

22

23

24

25

26 **Abstract**

27 **Background:** The full catalogue of satellite DNA (satDNA) within a same genome  
28 constitutes the satellitome. The Library Hypothesis predicts that satDNA in relative  
29 species reflects that in their common ancestor, but the evolutionary mechanisms and  
30 pathways of satDNA evolution have never been analyzed for full satellitomes. We  
31 compare here the satellitomes of two Oedipodine grasshoppers (*Locusta migratoria* and  
32 *Oedaleus decorus*) which shared their most recent common ancestor about 22.8 Ma ago.

33 **Results:** We found that about one-third of their satDNA families (near 60 in every  
34 species) showed sequence homology, and were grouped into 12 orthologous  
35 superfamilies. The turnover rate of consensus sequences was extremely variable among  
36 the 20 orthologous family pairs analyzed in both species. The satDNAs shared by both  
37 species showed poor association with sequence signatures and motives frequently  
38 argued as functional, except for short inverted repeats allowing short dyad symmetries  
39 and non-B DNA conformations. Orthologous satDNAs frequently showed different  
40 FISH pattern at both intra- and interspecific levels. We defined indices of  
41 homogenization and degeneration, and quantified the level of incomplete library sorting  
42 between species.

43 **Conclusions:** Our analyses revealed that satDNA degenerates through point mutation  
44 and rejuvenates through partial turnovers caused by massive tandem duplications (the  
45 so-called satDNA amplification). Remarkably, satDNA amplification increases  
46 homogenization, at intragenomic level, and diversification between species, thus  
47 constituting the basis for concerted evolution. We suggest a model of satDNA evolution  
48 by means of recursive cycles of amplification, degeneration, and rejuvenation, leading  
49 to mostly contingent evolutionary pathways where concerted evolution emerges  
50 promptly after lineages split.

51

52 **Keywords:** Satellite DNA, Library Hypothesis, Satellitome Evolution, Cytogenomics.

53

54

55

56

57

58

59

60

61

62

63

64

65

66

67

68

69

70

71

72

73

74

75

## 76 **Background**

77 Satellite DNA (satDNA) was first described by Kit (1961) in mouse and guinea-pig  
78 DNA with its repetitive nature demonstrated by Waring and Britten (1966). The first  
79 model for satDNA evolution was devised by Smith (1976), who demonstrated that DNA  
80 sequences that are not maintained by natural selection evolve a tandem repeat structure  
81 due to unequal crossing-over. Later, theoretical analyses assumed that satDNA  
82 evolution usually depends on mutation, unequal crossing-over, and random drift, with  
83 purifying selection controlling for excessive copy number (Kimura and Ohta 1979; Ohta  
84 1981, 1983; Ohta and Kimura 1981; Stephan 1986, 1987, 1989; Charlesworth et al.  
85 1986).

86 Changes in satDNA amount are mainly due to unequal crossing-over, although  
87 other mechanisms have been proposed to explain both amplification and spread of  
88 satDNA repeats (for review, see Garrido-Ramos 2017). Walsh (1987) proposed the  
89 replication of extrachromosomal circles of tandem repeats by the rolling-circle  
90 mechanism and reinsertion of replicated arrays as a powerful satDNA amplification  
91 process, a mechanism for which Cohen et al. (2005, 2010) have found some support.  
92 Additionally, transposition may operate in satDNA emergence and amplification  
93 (Šatović and Plohl 2013; Pavlek et al. 2015; Meštrović et al. 2015; Šatović et al. 2016).  
94 Ultimately, replication-slippage might be an amplification process (Stephan 1989;  
95 Walsh 1987), mainly involved in lengthening satellite monomers from basic shorter  
96 ones (Ruiz-Ruano et al. 2018a).

97 To explain the conservation of satellite sequences over long evolutionary periods,  
98 Fry and Salser (1977) suggested the Library Hypothesis. According to this hypothesis, a  
99 group of related species should share a common library of satDNA sequences that  
100 mostly show quantitative differences among species due to differential amplification.

101 Therefore, a given member of the library may appear as an abundant satDNA, while  
102 others remain at low amounts and technically undetectable. Now we know that the  
103 former can be visualized by FISH and the latter discovered by next-generation  
104 sequencing (Ruiz-Ruano et al. 2016). Fry and Salser (1977) suggested that an essential  
105 step in the evolution of some satDNA families may be the acquisition of a biological  
106 function, in which case natural selection would conserve its sequence for long  
107 evolutionary periods (Djupedal et al. 2009; Schueler et al. 2010; Fachinetti et al. 2015).

108         There are some examples of satDNA persisting for long, i.e., more than 40-100  
109 Ma (see Arnason et al. 1992; Garrido-Ramos et al. 1995, 1999; de la Herrán et al.  
110 2001a,b; Mravinac et al. 2002, 2005; Robles et al. 2004; Cafasso and Chinali 2014).  
111 Whereas the conservation of functional satDNA repeats is explained by purifying  
112 selection (see references above), the persistence over time of other satDNA arrays  
113 lacking apparent function might be simply due to chance events (Stephan 1986, 1987,  
114 1989; Walsh 1987; Harding et al. 1992). Therefore, whether satDNA conservation in  
115 two or more species is just chance or due to selective events remains unanswered.

116         Dover (1982a,b) suggested unequal crossing-over, gene conversion, and  
117 transposition as molecular drive mechanisms for the concerted fixation of paralogous  
118 variants, which operate independently of natural selection and drift. Recently, this  
119 evolutionary pattern has been replaced by the birth-and-death model in the case of  
120 coding multigene families (Nei and Rooney 2005; Eirín-López et al. 2012). Concerted  
121 evolution implies that paralogous copies are more homogenized than orthologous ones  
122 when two species are compared. SatDNA families comprise thousands or millions of  
123 copies of non-coding paralogous repeat units, frequently arranged in many short arrays  
124 spread at different genomic locations (Kuhn et al. 2012; Brajković et al. 2012; Feliciello  
125 et al. 2015; Pavlek et al. 2015; Ruiz-Ruano et al. 2016), so that fixation is improbable in

126 these conditions. In fact, although concerted evolution is the predominant pattern for  
127 satDNA evolution, non-concerted evolution has also been reported and explained  
128 through various factors such as life-history, population, location, organization, number  
129 of repeat-copies, or functional constraints (for review, see Garrido-Ramos 2015, 2017).  
130 However, the ultimate causes for concerted or non-concerted patterns are still unknown.

131 In this paper, we compare the full catalogue of satDNA families (i.e., the  
132 satellitome) between two grasshopper species belonging to the subfamily Oedipodinae,  
133 *Locusta migratoria* (Lmi) and *Oedaleus decorus* (Ode), which diverged 22.81 Ma  
134 (Song et al. 2015). We show the presence of about one-third of orthologous satDNA  
135 families whose sequence comparison pointed to mutation and drift as the main drivers  
136 of satDNA evolution. We also got estimates of nucleotide turnover rate at the level of  
137 consensus sequences (consensus turnover rate, CTR), using 20 orthologous pairs  
138 present in both species, and found that they were highly variable and depended on the  
139 history of satDNA amplifications. We also analyzed repeat landscapes and developed  
140 indices for satDNA homogenization and degeneration and an index for concerted  
141 evolution, which may be useful for future research. Also, we propose a general model  
142 for satDNA evolution and suggest that the evolution of these sequences constitute a  
143 good example of contingent evolution (see Blount et al. 2018).

144

## 145 **Results**

### 146 **One-third of satDNA families showed sequence homology between species**

147 The range of variation for repeat unit length (RUL) was 8-400 bp for the 60 satDNA  
148 families found in *L. migratoria* and 12-469 bp for the 58 families found in *O. decorus*.  
149 For subsequent analyses we included only those satDNA families showing more than  
150 100 copies, which excluded the four least abundant satDNAs in *L. migratoria* (Table

151 S1). After comparing the consensus sequences of all satDNA families present in both  
152 species, we found that 21 families in *O. decorus* showed homology with 20 in *L.*  
153 *migratoria* (Table S2). We assume that these sets of satDNAs showing some sequence  
154 identity were already present in the most recent common ancestor of these two species  
155 (dated about 22.81 Ma) and thus belonged to the ancestor satDNA library. Therefore,  
156 these homologous sets constituted 12 orthologous superfamilies (OSFs) including 31  
157 and 44 subfamilies in *O. decorus* and *L. migratoria*, respectively (Table S2). On the  
158 other hand, the non-shared satDNA families (37 in *O. decorus* and 36 in *L. migratoria*)  
159 could have arisen *de novo* after both lineages split, or else they had got lost in one of the  
160 species.

161 Between species comparison of basic satellitome features (Table 1) revealed that  
162 shared satDNAs did not show significant differences between species for RUL, A+T  
163 content, and abundance, but divergence was lower in *L. migratoria*. However, the non-  
164 shared satDNAs showed higher RUL and abundance in *O. decorus*. Within species  
165 comparisons between shared and non-shared satDNAs failed to show differences in *O.*  
166 *decorus*. In *L. migratoria*, however, the shared satDNA families showed higher RUL,  
167 A+T content and abundance, and lower divergence, than the non-shared ones (Table 1).  
168 Taken together, these results revealed the presence of many satDNA families showing  
169 short monomers among the non-shared ones in *L. migratoria* which also showed lower  
170 A+T content and abundance, but higher divergence than those shared with *O. decorus*.

171

## 172 **Tandem structure and association with other repetitive elements**

173 The quantification of homogeneous and heterogeneous read pairs allowed estimating the  
174 degree of tandem structure (TSI) for each satDNA family (Table S1). The annotation of  
175 the heterogeneous read pairs allowed identifying other genomic elements adjacent to

176 satDNA (Table S3). This revealed that LmiSat03-195 (TSI= 99.7%) was associated  
177 with LINEs in 57 out of the 100 heterogeneous read pairs observed. However, only 2%  
178 of the 1,356 heterogeneous read pairs showed association with LINEs for its  
179 orthologous OdeSat02-204 (TSI= 95.9%), suggesting that association with LINEs  
180 occurred only in *L. migratoria*. Likewise, OdeSat17-176 and LmiSat02-176 showed  
181 association with Helitron TEs in 93% and 76% of the 2,379 and 1,356 heterogeneous  
182 read pairs observed, respectively. Bearing in mind that the sequence of the LmiSat02-  
183 176 repeat unit shows homology with Helitron TEs (Ruiz-Ruano et al. 2016), the high  
184 frequency of association with Helitron observed for OdeSat17-176 and the low TSI  
185 (11.1%) suggest that most units detected for this satDNA were part of the TE itself and  
186 are not in tandem (i.e., 1-TSI= 88.9%). However, LmiSat02-176 showed high TSI  
187 (94.7%) and lower association with the TE (76%), suggesting that this satDNA arose  
188 from this TE, but it also constitutes an independent entity which has reached quite long  
189 arrays in *L. migratoria* (longer than 20 kb in the MinION reads). The FISH pattern of  
190 both satDNAs (see below) reinforced this conclusion, as OdeSat17-176 yielded no  
191 hybridization signals (Table 2), whereas LmiSat02-176 showed pericentromeric bands  
192 on six chromosome pairs (see Ruiz-Ruano et al. 2016 and Table S1).

193

194 **A same orthologous satDNA may show different FISH patterns at intra- and**  
195 **interspecific levels**

196 FISH analysis for 14 OdeSat families which showed homology with 20 LmiSat ones,  
197 revealed that six OdeSats displayed conspicuous bands on chromosomes (B-pattern  
198 from hereafter) whereas the eight remaining failed to show FISH signal (NS-pattern  
199 from hereafter), of which seven showed the B-pattern in *L. migratoria* (Table 2). This



200 revealed that a same OSF may show FISH signals in one species but not in a close  
201 relative.

202 To search for molecular differences between satDNAs showing the B- and NS-  
203 patterns, we analyzed MinION long reads in *L. migratoria* to score the maximum array  
204 length (MAL) for each LmisatDNA (Table 2). Even though coverage was very low  
205 (0.02x), we found that none of the seven NS families analyzed showed arrays higher  
206 than 2,500 bp, whereas almost half of those showing the B pattern did it (Gardner-  
207 Altman unpaired mean difference= 2930, 95.0%CI: 1540, 4790), and the three orders of  
208 magnitude of the difference indicated that satDNAs with the B-pattern have been  
209 submitted to more (and extensive) amplification events than those showing the NS-  
210 pattern. This difference justifies using the presence of FISH signals as an indication of  
211 the degree of satDNA amplification. The fact that 18 out of 20 orthologous satDNA  
212 families in *L. migratoria* showed the B-pattern, whereas only six out of the 14  
213 orthologous families analyzed in *O. decorus* showed it, represent the first indication for  
214 a higher incidence of satDNA amplifications in *L. migratoria* (RxC contingency test,  
215 with 50,000 replicates: P= 0.00562, SE= 0.00077). This result was reinforced by the  
216 fact that the 14 OdeSat families included 24 subfamilies whereas the 20 LmiSat ones  
217 included 44 subfamilies (Table 2) (Wilcoxon matched-pairs test: z= 2.11, N=12, P=  
218 0.035). As subfamilies represent different amplification events, the former results  
219 demonstrate that a same orthologous satDNA may show different amplification  
220 trajectories during their independent evolution in different species.

221 Careful examination of orthologous satDNAs revealed a unique case of no  
222 satDNA amplification in both species during the 22.8 Ma of separate evolution, as the  
223 LmiSat27-57 and OdeSat41-75 OSF showed the same NS-pattern. Consistently with  
224 their low degree of amplification, these two satDNAs showed very low values for TSI

225 (9% in *O. decorus* and 32% in *L. migratoria*) and RPS (29% and 32%, respectively),  
226 indicating poor tandem structure and homogenization (see Tables 2 and S4). The  
227 remaining OSFs, however, showed amplification in at least one species. An interesting  
228 case was OSF7, where one of the five *L. migratoria* families showed the NS-pattern  
229 (LmiSat24-266) whereas the four remaining (LmiSat28-263, LmiSat43-231, LmiSat45-  
230 274 and LmiSat54-272) showed the B- pattern. Likewise, one of the two *O. decorus*  
231 families (OdeSat28-276) showed the B-pattern whereas the other (OdeSat58-265)  
232 showed the NS one. This shows that homologous satDNAs can display the NS or B  
233 patterns at intra- and interspecific levels. In fact, seven orthologous satDNA families  
234 with the NS-pattern in *O. decorus* showed the B-pattern in *L. migratoria* (Table 2).

235 One of the most dramatic differences was found for the orthologues OdeSat59-  
236 185 and LmiSat01-185, which were the scarcest and the most abundant satDNAs in *O.*  
237 *decorus* and *L. migratoria*, respectively, with the latter showing pericentromeric FISH  
238 bands on all chromosomes (Ruiz-Ruano et al. 2016) and OdeSat59-185 showing the  
239 NS-pattern (Table 2). Finally, even those satDNAs with FISH bands in both species  
240 showed remarkable differences regarding chromosome location (proximal, interstitial,  
241 or distal; see Table S1). Taken together, these results show that orthologous satDNAs  
242 can display disparate chromosome distribution in separate species due to their  
243 independent evolution. These differences can range from short arrays being  
244 undetectable by FISH, which may eventually serve as seeds for species-specific  
245 amplification (as suggested by Ruiz-Ruano et al. 2016), up to long arrays yielding  
246 conspicuous FISH bands.

247  
248  
249

## 250 **SatDNA homogenization and degeneration**

251 SatDNA evolution is debated between homogenization (through amplification) and  
252 degeneration (resulting from mutational decay). It would thus be desirable to find  
253 satDNA parameters being good indices for these two alternative states. To search for a  
254 homogenization index, we hypothesized that it should show a high negative correlation  
255 with intraspecific divergence. Spearman rank correlation analysis showed that, in both  
256 species, RPS (relative peak size, see methods and Fig. 1) showed a very high negative  
257 correlation with divergence (measured as K2P) ( $r_s = -0.9$  in both species) (Table 3),  
258 which revealed RPS as a good homogenization index. On the contrary, a degeneration  
259 index should be negatively correlated with homogenization, and Spearman rank  
260 correlations revealed that DIVPEAK showed the highest negative correlation index with  
261 RPS in both species (Table 3). This means that the relative size of amplification peaks  
262 decreases as satDNA sequences accumulate divergence through mutational decay since  
263 the last satDNA amplification (see repeat landscapes in Figs. 2, S1 and Dataset 1).

264 To ascertain whether satDNA degeneration, measured by DIVPEAK, is  
265 associated with any of the satDNA parameters analyzed (RUL, A+T, no. subfam and  
266 TSI), we performed Spearman rank correlation analyses, which revealed that RUL was  
267 the only satDNA property showing significant correlation with DIVPEAK (Table 3) and  
268 it was negative and of similar magnitude as that between DIVPEAK and RPS. This  
269 suggests that RUL is an important determinant of satDNA degeneration, with shorter  
270 satDNAs degenerating faster. A possible explanation is that short monomers degenerate  
271 faster through mutational decay because every point mutation implies a higher  
272 proportion of degeneration for short than for long monomers, as if the Muller's ratchet  
273 would have fewer teeth for short than long repeat units and the same number of new

274 mutations would imply a higher number of ratchet's turns for short repeating units than  
275 for long ones.

276 The analysis of the statistical properties of RPS and DIVPEAK indicated that, in  
277 both species, RPS fitted a normal distribution (ODE:  $\chi^2= 4.45$ ,  $df= 3$ ,  $P= 0.215$ ; LMI:  
278  $\chi^2= 4.78$ ,  $df= 3$ ,  $P= 0.189$  whereas DIVPEAK fitted an exponential distribution (ODE:  
279  $\chi^2= 4.55$ ,  $df= 2$ ,  $P= 0.103$ ; LMI:  $\chi^2=4.93$ ,  $df= 3$ ,  $P= 0.177$ ). Their scales ranged between  
280 0 and 1 for RPS and between 0 and 27% (within the 0-40% scale of divergence  
281 measured here) for DIVPEAK.

282 We suggest that satDNA families follow evolutionary pathways that include  
283 recursive cycles of homogenization (through amplification by tandem duplication) and  
284 degeneration (through random mutation). After an amplification event, homogenization  
285 (measured by RPS) will increase, and degeneration (measured by DIVPEAK) will  
286 decrease. As time goes by, with no other amplification events, RPS will decrease and  
287 DIVPEAK will move towards higher values. An expected outcome of mutation  
288 accumulation is reducing the kurtosis of the repeat landscape (RL) distribution (i.e.,  
289 curve flattening, Fig. 1 for examples). In fact, kurtosis was correlated negatively with  
290 DIVPEAK (Ode:  $N=58$ ,  $r_s= -0.80$ ,  $t= 9.89$ ,  $P<0.000001$ ; Lmi:  $N=56$ ,  $r_s= -0.76$ ,  $t= 8.58$ ,  
291  $P<0.000001$ ) and positively with RPS (Ode:  $N=58$ ,  $r_s= 0.80$ ,  $t= 9.68$ ,  $P<0.000001$ ; Lmi:  
292  $N=56$ ,  $r_s= 0.83$ ,  $t= 10.98$ ,  $P<0.000001$ ). Kurtosis is thus proportional to RPS, so that  
293 highly homogenized satDNAs show leptokurtic RLs whereas highly degenerated ones  
294 show platikurtic RLs. It is thus expected that kurtosis and RPS are high for recently  
295 amplified satDNAs and low for satDNAs which have not undergone amplification since  
296 long (see some examples in Figs. 2 and S1). Although these parameters do not  
297 constitute absolute measures of time, however, they can be useful as measures of "time

298 since the last satDNA amplification". As satDNA can undergo successive amplifications  
299 across evolutionary time, we can also consider RPS and kurtosis as rejuvenation indices.

300 To analyze whether conservation of the orthologous satDNA families in both  
301 species was associated with homogenization and degeneration indices, we compared  
302 them between the shared and non-shared satDNA families found in each species. In *O.*  
303 *decorus*, the effect size (unpaired mean difference) found between non-shared and  
304 shared satDNAs by means of Gardner-Altman estimation plots, revealed no mean  
305 differences for RPS (unpaired mean difference= -0.0682, 95.0%CI: -0.159, 0.0348),  
306 kurtosis (unpaired mean difference= 0.678, 95.0%CI: -1.62, 5.78) and DIVPEAK  
307 (unpaired mean difference= 1.13, 95.0%CI: -0.954, 5.61), indicating similar levels of  
308 homogenization/rejuvenation and degeneration in both groups. In *L. migratoria*,  
309 however, the three indices showed differences between shared and non-shared satDNA  
310 families, indicating higher homogenization/rejuvenation and lower degeneration for the  
311 shared ones (Fig. 3).

312

### 313 **Amplification explains the concerted evolution of satDNA**

314 *O. decorus* and *L. migratoria* shared their most recent common ancestor 22.81 Ma, on  
315 which basis we could perform estimations of interspecific rates of turnover in the  
316 consensus sequences (CTR). For this purpose, we compared the consensus DNA  
317 sequences of 20 pairs of orthologous satDNA, representing half of the 40 estimations  
318 that could be done at family level (see Table S2). The values obtained for CTR in the 20  
319 orthologous pairs ranged from 0.013% (between LmiSat02-176 and OdeSat17-176) to  
320 2.86% (between LmiSat03-195 and OdeSat02-204) nucleotidic changes in their  
321 consensus sequences per million year (mean= 1.11%, see Table 2), with two orders of  
322 magnitude between the extreme values.

323 To search for possible causes for such an extreme variation in the observed rates,  
324 we performed forward stepwise multiple regression of CTR (dependent) on four factors  
325 related to satDNA amplification: for each species, the number of subfamilies per  
326 satDNA family (subfam), the absolute number of copies included in the 5% divergence  
327 peak (peak-copies), RPS, and TSI. The results revealed that only three out of the eight  
328 factors entered a model that explained 85% of the total variance in CTR, with  
329 Ode\_subfam explaining 56.4%, Ode\_peak\_copies explaining 25.7%, and TSI\_Ode  
330 explaining only a nonsignificant 2.8% (Table 4). Variance inflation factors of this  
331 regression analysis ranged between 1.07 and 3.01 indicating the absence of  
332 multicollinearity. Likewise, the standardized residuals of this regression fitted a normal  
333 distribution (Shapiro-Wilks test:  $W = 0.97$ ,  $P = 0.82$ ). Finally, partial correlations were  
334 0.85 for Ode\_subfam, 0.76 for Ode\_peak\_copies, and 0.40 for TSI\_Ode, whereas they  
335 were much lower for the five factors failing to enter in the model (from -0.25 to -0.02).

336 As we defined satDNA subfamilies by sharing 95% or higher sequence identity,  
337 i.e., up to 5% divergence, which was exactly the same figure used to define RPS and  
338 DIVPEAK on RLS, we consider that the number of subfamilies actually represents the  
339 number of independent amplification events being apparent within each family, as it  
340 also coincides with the number of different consensus sequences per family. As peak-  
341 copies represents the total number of repeat units in the amplification peak, we can infer  
342 that the rate of nucleotide change estimated from consensus sequences (CTR), which is  
343 positively correlated with the two former parameters, roughly represents the rate of  
344 nucleotide changes driven by satDNA amplification to be part of the consensus  
345 sequence. It was remarkable that only *O. decorus* variables entered in the stepwise  
346 multiple regression model, as it is the species showing the lowest number of subfamilies  
347 (31 versus 44 in the 12 OSFs, as a whole, and 24 and 44 in the 14 orthologous pairs

348 analyzed) and thus showed fewer amplification events, suggesting that CTR value is  
349 limited by the species showing fewer amplification events. We thus conclude that the  
350 same molecular mechanism, i.e., satDNA amplification, causes intraspecific  
351 homogenization and interspecific diversification, thus explaining the concerted  
352 evolution pattern of satDNA. Finally, we suggest that satDNA amplification (i.e.,  
353 through unequal crossover leading to tandem duplication, i.e. a mutational mechanism)  
354 is the true force for Dover's *molecular drive*, but given its contingent nature, it should  
355 instead be named "*molecular drift*".

356

### 357 **Most satDNA families showed concerted evolution in both species**

358 Concerted evolution predicts that  $CEI > 0$ , and this was met for 16 orthologous pairs, the  
359 four exceptions being the OdeSat17-LmiSat02 pair and three satDNA families in *O.*  
360 *decorus* (OdeSat41, OdeSat57, and OdeSat59) where  $CEI < 0$  thus showing signs of non-  
361 concerted evolution (Table 2). Remarkably, these four OdeSats failed to display FISH  
362 bands, suggesting that poor amplification might be related with non-concerted evolution.  
363 In both species, CEI was positively correlated with RUL (Ode:  $r_s = 0.70$ ,  $N = 14$ ,  $t = 3.4$ ,  
364  $P = 0.0051$ ; Lmi:  $r_s = 0.56$ ,  $N = 20$ ,  $t = 2.83$ ,  $P = 0.011$ ) and RPS (Ode:  $r_s = 0.73$ ,  $N = 14$ ,  $t =$   
365  $3.67$ ,  $P = 0.0032$ ; Lmi:  $r_s = 0.68$ ,  $N = 20$ ,  $t = 3.88$ ,  $P = 0.0011$ ) but not with A+T content  
366 ( $P > 0.05$  in both species). In addition, CEI was positively correlated with TSI in *O.*  
367 *decorus* ( $r_s = 0.78$ ,  $N = 14$ ,  $t = 4.26$ ,  $P = 0.0011$ ) but not in *L. migratoria* ( $r_s = 0.43$ ,  $N = 20$ ,  
368  $t = 2.04$ ,  $P = 0.056$ ). Finally, in *O. decorus*, CEI was higher in the six satDNAs showing  
369 the FISH B-pattern than in the eight showing the NS-pattern (unpaired mean  
370 difference = 2.63; 95% CI: 0.883, 5.36).

371 These results indicate that satDNAs displaying longer monomers, higher levels  
372 of homogenization and the FISH B-pattern show higher indices of concerted evolution.

373 Exceptional non-concerted patterns were observed for satDNA families showing a low  
374 number of amplifications since all showed a single subfamily in both species.

375

376 **The persistency of satDNA in these two species was not associated with functional**  
377 **constraints**

378 Several sequence features have hitherto been associated with a variety of putative  
379 satDNA biological roles, the most relevant being centromere function. We searched for  
380 short internal repeats within each satDNA family's consensus sequences since these  
381 repeats have been associated with sequence function. We found no direct repeats within  
382 the sequence span of any satDNA sequence. On the contrary, it was common to find  
383 short inverted repeats in all satDNA families that might facilitate non-B DNA  
384 conformations such as stem-loops and cruciform structures, but they were found in both  
385 shared and non-shared satDNA families.

386 To ascertain whether Gibbs free energy (dG) of satDNA sequence depends on  
387 some satDNA properties, we performed forward stepwise regression, in each species,  
388 with dG as dependent variable and RUL, A+T, sharing status and degeneration status  
389 (DIVPEAK) as independent factors. In *Ode*, the regression model explained 67% of the  
390 variance in dG (59% by RUL, 5% by A+T, and 3% by DIVPEAK). The correlation was  
391 negative with RUL and positive with the two other factors. In *L. migratoria*, the result  
392 was highly similar, except that DIVPEAK did not enter in the model, but the dG  
393 variance explained was higher, reaching 83% (79% by RUL and 4% by A+T). As  
394 higher free energy values correspond to lower dG values, the former results indicate that  
395 free energy of satDNA sequence depends positively on RUL, as it determines the  
396 likelihood of autopairing, and, at lower extent, also depends on two other sequence  
397 properties influencing the number of hydrogen bonds in the double helix, as higher A+T



398 content implies more A-T pairs and fewer hydrogen bonds, thus lower free energy,  
399 whereas higher DIVPEAK indicates higher mutational decay that might difficult  
400 autopairing thus decreasing the number of hydrogen bonds. The fact that DIVPEAK of  
401 the shared satDNAs was higher in *O. decorus* than *L. migratoria* (paired mean  
402 difference= 2.6, 95.0%CI: 0.55, 6.8) is consistent with their higher degeneration in *O.*  
403 *decorus*.

404 We found that most of the shared satDNA families failed to show a propensity to  
405 acquire stable curvatures (Table S1), even though the curvature-propensity plots  
406 contained a peculiar maximum in some of them. However, the magnitude of these peaks  
407 (11 to 13 degrees/10.5 bp helical turn) was far from the values calculated for other  
408 highly curved motifs (Goodsell and Dickerson 1994; Gabrielian et al. 1996). Most  
409 intriguingly, these peaks were similar for satDNAs showing the NS or B FISH patterns  
410 or, in the latter case, whether they were located on pericentromeric regions or not. In  
411 total, only 11 (7 in *L. migratoria* and 4 in *O. decorus*) out of the 34 shared satDNA  
412 families showed curvature propensity, all showing  $RUL \geq 185$  bp. They belonged to five  
413 different OSFs, three of which showed curvature propensity in both species, whereas  
414 the two remaining showed it in only one species, suggesting that this property does not  
415 depend only on RUL, which was highly similar in both species for these satDNA  
416 families.

417 We also analyzed curvature propensity for the non-shared satDNAs, and none  
418 of them showed it to a large degree. Notwithstanding, as observed for shared satDNAs, a  
419 few families (one in *L. migratoria* and five in *O. decorus*) showed a conspicuous peak  
420 of magnitudes between 11 to 14 degrees/10.5 bp helical turn. It has been suggested that  
421 DNA curvature may be involved in the recognition of DNA-binding protein  
422 components of the heterochromatin (Plohl et al. 2012). Our results show that curvature

423 propensity is not differentially frequent or relevant in the 34 shared satDNAs analyzed  
424 in both species, compared with the non-shared ones. Therefore, we believe that  
425 curvature propensity is not a relevant feature of satDNA or the cause for satDNA  
426 conservation in these two species.

427 Finally, we searched for the presence of short sequence motifs common to the  
428 shared satDNA families in both species. We isolated individual monomers from each  
429 satDNA family and calculated nucleotide diversity ( $\pi$ ) per position (not shown). We did  
430 not find conserved motifs in these satDNAs, irrespectively of their FISH pattern or  
431 chromosomal location.

432 Taken together, these results show that, in these two species, there is no  
433 sequence conservation for pericentromeric satDNAs, which also lack significant  
434 sequence signatures other than A+T richness and repeat length. On the other hand, all  
435 putative functional signatures analyzed here were not more frequent in the shared  
436 satDNAs than in the non-shared ones. We interpret this as evidence that satDNA  
437 conservation is mostly a contingent event.

438

### 439 **Incomplete sorting of the satDNA library**

440 The satellitomes of relative species show sequence homology for a fraction of their  
441 satDNA families, which is the best support for the satDNA library hypothesis (Fry and  
442 Salser 1977). Joint analysis of RLs and MSTs revealed interesting properties of the  
443 satDNA library (Figs. 2 and S1): i) OdeSat02A and LmiSat03A were the two OSF02  
444 subfamilies showing the highest amplification peaks in the RLs (Fig. 2a, plot on the  
445 left), and they also showed the highest CTR observed among all those analyzed here  
446 (2.86% per Ma). Remarkably, the MST plot for all subfamilies and families comprising  
447 OSF02 revealed complete sorting per species for this component of the library (Fig. 2a,

448 right). ii) On the other hand, OSF12 included two families in *L. migratoria* (LmiSat01  
449 and LmiSat13) which were fully sorted in the MST (Fig. 2b, right), whereas the single  
450 *O. decorus* family (OdeSat59) was remarkably similar to LmiSat01A, with only two  
451 nucleotidic differences in their sequence, which is lower than those shown by the four  
452 other *L. migratoria* subfamilies with LmiSat01A. This illustrates an extreme case of  
453 incomplete library sorting (ILibS) and the second lowest CTR value (0.26% per Ma).  
454 Other OSFs showed intermediate situations. For instance, OSF04 showed CTR values  
455 between 1.16 and 1.60 and their MST revealed the existence of ILibS, with OdeSat32A  
456 being connected with three different LmiSats (37A, 26A and 51A), the latter being  
457 placed between OdeSat32A and OdeSat21A (see Fig. S1a). On the contrary, OSF5 (Fig.  
458 S1b) showed high CTR values (>2% per Ma) and complete library sorting, with the  
459 satDNAs properly separated between species. Finally, OSF07 showed CTRs between  
460 0.56 and 1.43 and apparent ILibS, with high level of intermixing between the satDNAs  
461 of both species (Fig. S1c). Taken together, these observations suggest that CTR values  
462 are inversely associated with the level of ILibS. On this basis, we used the maximum  
463 CTR value (maxCTR= 2.86) as reference to estimate the degree of ILibS as one minus  
464 the quotient between CTR<sub>i</sub> and maxCTR (see Table 2). This indicated that the satDNA  
465 library of *O. decorus* and *L. migratoria* shows, on average, 61% of incomplete sorting  
466 after 23 Ma. Finally, the fact that the four OdeSats showing the non-concerted pattern  
467 were those showing the highest ILibS figures (0.88-1), whereas ILibS values up to 0.84  
468 corresponded with patterns of concerted evolution (see OSF8 in Table 2), suggested the  
469 possible existence of a threshold for ILibS (between 0.84 and 0.88) below which  
470 satDNA evolution is concerted.

471

472

## 473 **Discussion**

### 474 **SatDNA evolution is mostly contingent**

475 Comparative analysis of the satellitome in the grasshoppers *O. decorus* and *L.*  
476 *migratoria*, two species belonging to the Oedipodinae subfamily, which shared their  
477 most recent common ancestor about 23 Ma, gave us a chance to take a look into  
478 satDNA library evolution during this period. We assume that the 41 satDNA families  
479 (20 in *L. migratoria* and 21 in *O. decorus*) that showed sequence homology between  
480 species belong to 12 orthologue groups already present in the ancestor library, which  
481 have been conserved up today. However, the remaining 84 families (36 in *L. migratoria*  
482 and 37 in *O. decorus*) could represent either remnant satDNAs conserved in only one  
483 species or satDNAs arisen *de novo* during the separate evolution of these species. To  
484 distinguish between these two possibilities, it is necessary to analyze other oedipodine  
485 species. The occurrence of a species-specific profile of satDNAs resulting from  
486 differential amplifications and/or contractions from a pool of sequences shared by  
487 related genomes is a prediction of the library hypothesis of satDNA evolution with the  
488 subsequent replacement of one satDNA family for another in different species (Fry and  
489 Salser 1977). By analogy with incomplete lineage sorting (ILS) in phylogenetic studies,  
490 satDNA amplifications and/or contractions between close relative species may yield a  
491 pattern of incomplete library sorting (ILibS). We have detected here this phenomenon  
492 using consensus sequences, but the use of physical sequences would yield even higher  
493 rates of ILibS.

494 The library hypothesis predicts the residual retention of low-copy counterparts  
495 of the dominant satDNA of one species in the other (Fry and Salser 1977). For instance,  
496 OdeSat02A-204 and LmiSat03A-195 have been independently amplified in both species,  
497 reaching among the highest genomic abundances in both species, and showed the

498 highest CTR and extensive diversification, with four subfamilies in *O. decorus* and six  
499 in *L. migratoria* (see Fig. 2a). In addition, a joint MST for OSF02 (to which both  
500 satDNA families belong) revealed the absence of ILibS as all satDNA families and  
501 subfamilies appeared well separated between species in the MST (see Fig. 2a).  
502 Conversely, the consensus sequences of LmiSat01A-185 and OdeSat59-185 only  
503 differed in two positions, thus showing higher interspecific similarity than that found, at  
504 intraspecific level, between the five *L. migratoria* subfamilies (see Fig. 2b), thus  
505 constituting an extreme example of ILibS. The high similarity in the consensus  
506 sequences of OdeSat59A and LmiSat01A cannot be explained by functional  
507 conservation because only the latter shows FISH bands on centromeric regions of all  
508 chromosomes thus probably playing a centromeric function in *L. migratoria*, whereas  
509 OdeSat59A is the most scarce satDNA found in *O. decorus* thus being only a relic.  
510 Likewise, while OdeSat01-287 is the most abundant satDNA in *O. decorus*, its  
511 orthologous (LmiSat09-181) is a relict in *L. migratoria*. We thus believe that the  
512 observed sequence similarity between OdeSat59A and LmiSat01A might be due to  
513 chance convergence, as the likelihood of nucleotide coincidence in each position of the  
514 consensus sequence is a function of the relative frequency of the four possible  
515 nucleotides in each species, thus being a probabilistic issue.

516 Our estimates of ILibS from CTR values indicated that the satDNA libraries of  
517 *O. decorus* and *L. migratoria* still show 61% of incomplete sorting after 23 Ma of  
518 independent evolution, i.e. about 39% of complete sorting (1.7% per Ma). This extreme  
519 cohesiveness of the satDNA library is due to the highly paralogous nature of these  
520 genomic elements, with thousand copies evolving at once, independently in both species,  
521 through point mutation, amplification (tandem duplication) and drift (see below). This  
522 39% expresses only part of library divergence, as the maximum divergence would be

523 reached when all homology signals between satDNAs in both species would have been  
524 erased, as in the case of the non-shared ones, whereas the satDNAs belonging to OSF02  
525 are still recognized as homologous between species even with 100% library sorting.  
526 Anyway, the ILibS parameter of a given OSF (or orthologous pair of satDNAs)  
527 inversely indicates its possible utility for phylogenetic analysis.

528 Another prediction of the library hypothesis is that the appearance of satDNA  
529 families would usually represent amplification of one of the satellites already present at  
530 a low level in the library, rather than actual *de novo* appearance. It is not easy to know if  
531 any of the non-shared satDNA families actually arose *de novo*. However, in *L.*  
532 *migratoria*, the lower RUL of non-shared satDNAs suggests that the satellitome of this  
533 species might harbor some *de novo* arisen short satellites, in consistency with an  
534 evolutionary trend towards increasing monomer length and complexity, suggested by  
535 theoretical (Stephan and Cho 1994) and experimental (Garrido-Ramos et al. 1995; de la  
536 Herrán et al. 2001a; Navajas-Pérez et al. 2005; Ruiz-Ruano et al. 2018a) work.

537 Our estimates of CTR by the comparison of 20 orthologous pairs of satDNA  
538 families indicated that it was 1.11% per Ma, which implies that two satellites can  
539 diverge by more than 50% in about 50 Ma. This explains why *L. migratoria* and *O.*  
540 *decorus*, belonging to the Acrididae family do not share a single satDNA family with  
541 *Eumigus monticola* (Ruiz-Ruano et al. 2017), a grasshopper belonging to the  
542 Pamphagidae family, as these two orthopteran families shared their most recent  
543 common ancestor about 100 Ma (Song et al. 2015). Along with the stochastic nature of  
544 satDNA loss or gain during evolution, sequence changes at the mentioned rate will  
545 make unrecognizable a satDNA family after 100 Ma of separate evolution within the  
546 genomes of different species, which contrasts with the case of some other satDNAs  
547 preserved for more than 60 Ma (Garrido-Ramos et al. 1999; de la Herrán et al. 2001b;

548 Mravinac et al. 2002; Cafasso and Chinali 2014) or even more than 100 Ma (de la  
549 Herrán et al. 2001a; Robles et al. 2004).

550 Our results suggest that the same OSF may be involved in the centromeric  
551 function in a given species but not in a close relative species. According to Melters et al.  
552 (2013), the most abundant satDNAs in a genome are most likely involved in the  
553 centromeric function. Another feature suggesting this fact is satDNA location on  
554 pericentromeric regions of all chromosomes. Therefore, LmiSat01-185, OdeSat01-287  
555 and/or OdeSat02-204 are the best candidate families in these species since all meet the  
556 two conditions. However, all three satDNAs showed orthologous families in the other  
557 species displaying much more limited chromosome distribution, suggesting that one or  
558 both species have replaced the centromeric satDNA during the last 22.8 Ma. No  
559 significant track of signatures such as conserved motifs or sequence mediated specific  
560 stereo-spatial features were found for these or any other pericentromeric satDNAs found  
561 in these species. We thus believe that, in the absence of other evidence, contingent facts  
562 such as the opportunity to be in the right place when amplified might be responsible for  
563 centromeric satDNA turnover. Zhang et al. (2014) also revealed rapid divergence for  
564 centromeric sequences among closely related *Solanum* species and suggested that  
565 centromeric satellite repeats underwent boom-bust cycles before a favorable repeat  
566 became predominant in a species. Indeed, there are species such as chicken (Shang et al.  
567 2010), common bean (Iwata et al. 2013), or pea (Neumann et al. 2012) that contain  
568 different satDNAs in different centromeres.

569 Whether a given satDNA is conserved for long due to functional reasons is an  
570 open question. Fry and Salser (1977) suggested that an essential step in the evolution of  
571 a specific satDNA family may be acquiring a biological function. However, persistence  
572 over time of a satDNA might also be explained in terms that do not depend on natural

573 selection (Stephan 1986, 1987, 1989; Walsh 1987; Harding et al. 1992). Our results  
574 were consistent with this latter view. No conserved functional motifs were found within  
575 the monomers of every grasshopper satDNA analyzed as has been found in other  
576 satDNAs such as human centromeric satDNA (Masumoto et al. 1989, 2004; Muro et al.  
577 1992; Haaf et al. 1995). On the other hand, short dyad symmetries within satDNA  
578 repeats might be associated with thermodynamically stable secondary structures and  
579 yield non-B-form conformations, such as stem-loops or cruciforms. It has been claimed  
580 that these short dyad symmetries may play an important role in satDNA repeats as  
581 targets for protein binding and thus in satDNA function (Koch 2000; Hall et al. 2003;  
582 Luchetti et al. 2003; Plohl et al. 2012; Pezer et al. 2012; Garrido-Ramos 2015, 2017).  
583 Kasinathan and Henikoff (2018) have proposed that that cruciform structures formed by  
584 dyad symmetries may specify centromeres and that these non-B form DNA  
585 configurations in centromeric repeats may facilitate centromere assembly (Kasinathan  
586 and Henikoff 2018; Talbert and Henikoff 2018). In the two grasshopper species  
587 analyzed here, short inverted repeats that might facilitate dyad symmetries and non-B  
588 DNA conformations were frequent in both shared and non-shared satDNAs,  
589 independently of their organization and chromosomal location. We believe that this  
590 property is a simple outcome of stochastic processes of satDNA evolutionary dynamics.  
591 Its ubiquity suggests that almost any satDNA can be recruited for functions being  
592 dependent on the formation of non-B DNA conformations (see Kasinathan and  
593 Henikoff 2018).

594 SatDNA evolution is a topic of high interest for the scientific community, but  
595 with poor agreement about general pathways and mechanisms. Molecular drive was a  
596 turnover mechanism suggested by Dover (1982a,b) as a directional force for repeat  
597 fixation, in general, which has been the prevalent hypothesis for satDNA evolution due



598 to its apparent explicative power as a mechanism for sequence change, turnover, and  
599 concerted evolution. Nonetheless, the presence of satDNA arrays on multiple genomic  
600 sites makes it impossible, in practice, the fixation of a given satDNA repeat. The  
601 positive association of the number and extent of satDNA amplifications with the  
602 nucleotide substitution rate observed from consensus sequences suggests that molecular  
603 drive is actually a mutational force (tandem duplication by means of crossing-over) able  
604 to change copy numbers among the different sequence variants pre-existing for a given  
605 repeat family, most frequently leading to incomplete turnovers, and it operates mainly  
606 through satDNA amplification. A good way to visualize the role of amplification in  
607 satDNA evolution is through repeat landscapes for families consisting of several  
608 subfamilies remaining at low frequency for high divergence values that, at lower figures,  
609 show amplification peaks for one or more subfamilies (see Figs. 2 and S1).

610         The high or low degree of homogenization for a given satDNA is inversely  
611 proportional to the time since the last amplification. It thus depends on i) the neutral  
612 mutation rate introducing new sequence variants (increasing intra-specific divergence)  
613 and ii) the rate of satDNA amplification, implying partial turnovers that promote  
614 sequence variants that become new subfamilies. As satDNA amplification for  
615 orthologous satDNA families is independent in relative species, it behaves as an inter-  
616 specific drifting mechanism. This dual role of satDNA amplification as the major  
617 homogenizing force at the intraspecific level and as the principal driver for interspecific  
618 sequence divergence, forced by reproductive barriers, inevitably leads to the concerted  
619 evolution pattern. In fact, 16 pairs of orthologous satDNAs met this pattern, with only  
620 four showing a non-concerted one. Remarkably, these exceptions coincided with the  
621 absence of major amplifications in *O. decorus* satDNAs that remain at low abundance.  
622 This kind of variation can persist for long in the absence of (homogenizing)

623 amplification events (Navajas-Pérez et al. 2009). Therefore, concerted evolution should  
624 be a reasonable consequence of the stochastic nature of satDNA evolution, while  
625 exceptional non-concerted patterns can result from differential amplifications among  
626 species. Other exceptions can result from satDNA homology with TEs, as was the case  
627 for LmiSat02-176, whose homology with Helitron might have biased the calculation of  
628 intraspecific divergence. Other explanations have been raised as possible causes for  
629 non-concerted evolution patterns, such as the effect of location, organization, and  
630 repeat-copy number (Navajas-Pérez et al. 2005, 2006, 2009), population and  
631 evolutionary factors (de la Herrán et al. 2001a; Robles et al. 2004; Suárez-Santiago et al.  
632 2007; Quesada del Bosque et al. 2013, 2014), biological factors (Luchetti et al. 2003,  
633 2006; Lorite et al. 2017), or functional constraints (Mravinac et al. 2005).

634 We have shown here that concerted evolution is a pattern emerging from  
635 satDNA amplification due to the resulting homogenization at intraspecific level and  
636 diversification at interspecific level. To visualize this relationship, think about two  
637 species recently emerged from a common ancestor. Their satDNA libraries are almost  
638 identical at interspecific level but both retain the ancestral polymorphism at intraspecific  
639 level. This situation would imply, for each OSF, ILibS values next to 1 and CEI<0 since  
640 divergence would be higher at intra- than inter-specific level. As time goes by and  
641 mutation and drift operate, ILibS will decrease and CEI will increase as new mutations  
642 occur independently in both species. In absence of satDNA amplification, mutation and  
643 drift would lead satDNA towards concerted evolution by increasing interspecific  
644 divergence, although this process would be slow. However, the pathway to concerted  
645 evolution would be paved away by satDNA amplification as the resulting  
646 homogenization would reach CEI>0 values (by sharply decreasing intraspecific  
647 divergence) when ILibS would decrease below a threshold which, in the case of *O.*

648 *decorus* and *L. migratoria*, lies between 0.84 and 0.88. The fact that this threshold is so  
649 close to 1 reinforces the idea that concerted evolution is an unavoidable property fastly  
650 emerging from satDNA amplification. In fact, the four satDNA families which in *O.*  
651 *decorus* showed signs of non-concerted evolution showed low levels of homogenization  
652 (RPS between 0.29 and 0.40) and high values of ILibS (0.88-1), presumably due to the  
653 low level of amplification of these four satDNAs in this species. Taken together, our  
654 results indicate that concerted evolution is a state of interspecific diversification of the  
655 satDNA library, reached below a given ILibS threshold, which is fastly promoted by  
656 satDNA amplification.

657

#### 658 **A model for satDNA evolution**

659 Considering all findings derived from the quantitative analysis of 114 satDNAs in *O.*  
660 *decorus* and *L. migratoria*, we suggest the following model for satDNA evolution (Fig.  
661 4). Intragenomic changes are mainly stochastic, implying that satDNA families mainly  
662 evolve under the domain of mutation and drift. SatDNA arises from any tandem  
663 duplication yielding at least two monomers. Subsequent unequal crossover is the main  
664 source for longer arrays with the consequent increase in tandem structure. This tandem  
665 duplication is one of the two classes of mutation operating on satDNA. The other is  
666 point mutation increasing divergence among the different monomers composing the  
667 whole set of satDNA sequences belonging to a given family. When tandem duplication  
668 occurs massively during a short time, it constitutes an **amplification** event that  
669 decreases intra-specific divergence (i.e., increases homogenization as measured by RPS)  
670 by adding a high number of repeats showing identical sequence. Next, intra-specific  
671 divergence will grow across years by the incidence of point mutations, inevitably  
672 leading to the **degeneration** of the satDNA sequence unless new amplifications occur.

673 This is characterized by a temporal decrease of RPS and kurtosis and an increase of  
674 DIVPEAK as family sequences became more and more divergent. From time to time,  
675 some monomers will lose their identity as members of a given satDNA family (reaching  
676 identities lower than 80%) or even as members of the same superfamily (with no  
677 recognizable homology). This process may shorten long arrays into pieces, thus  
678 decreasing TSI and, finally, the satDNA may fade away across time.

679 In a sense, every new amplification event **rejuvenates** the satDNA family by  
680 promoting a given subfamily to the highest abundance and homogenization, after which  
681 it begins its degeneration process until new amplifications rejuvenate it again, or else  
682 fades out through accumulation of point mutations. In summary, we suggest that  
683 satDNA undergoes recursive cycles of amplification-degeneration-rejuvenation that  
684 may keep them in the genome for a long time. During this time, they can integrate into  
685 longer repeat units or higher-order structures (Willard and Waye 1987; Warburton and  
686 Willard 1990), or else disappear through sequence degeneration. The fact that short  
687 satDNAs degenerate faster than the longer ones (see above) suggests that their cycle is  
688 usually shorter than that of long satDNAs, partly explaining why many short satDNAs  
689 show high K2P divergence and platykurtic distribution. For instance, LmiSat10-9 is  
690 made of monomers of only 9 bp and is not found in Ode. Even if it would have been  
691 present in the common ancestor, it is doubtful that it would have remained for 22.8 Ma  
692 in both species without losing identity in at least one of them. In fact, there seems to be  
693 a minimum monomer length for homology conservation in these two species, which  
694 was 57 bp (LmiSat27-57 and OdeSat41-75). Alternatively, a satDNA formed by repeats  
695 of only 9 bp could have arisen *de novo*, by chance, in the gigantic genome of *L.*  
696 *migratoria* (Ruiz-Ruano et al. 2016).

697 In addition to all former intragenomic events, satDNA frequently undergoes  
698 spread among chromosomes. Transposition and replication of extrachromosomal circles  
699 of tandem repeats, by the rolling-circle mechanism, followed by reinsertion of  
700 replicated arrays, have been postulated as the main mechanisms for the amplification  
701 and spread of satDNA families and is supported by indirect (Fellicielo et al. 2005, 2006)  
702 or direct (Cohen et al. 2005, 2010) evidence.

703 At intergenomic (population) level, the only conceivable way to spread an  
704 amplification event (occurred in a single individual) is through differential reproduction,  
705 as we believe that the molecular drive mechanism suggested by Dover (1982a,b) as a  
706 non-selective fixing force even at the population level, is circumscribed at the  
707 intragenomic level. Differential reproduction can occur at random, i.e., by genetic drift,  
708 or non-random, i.e., through selection. The latter may be negative, setting up an upper  
709 limit to the amount of satDNA tolerable by a genome. Purifying selection, mutation and  
710 drift are the drivers in the mutational-hazard (MH) hypothesis (Lynch 2011; Lynch et al.  
711 2011), which suggests that the efficacy of purifying selection is impaired by genetic  
712 drift in small populations. This is especially applicable to satDNA, where CTR is highly  
713 variable among families (intragenomically). The fact that all satDNA families within a  
714 genome have been submitted to the same demographic changes at population level  
715 (excepting the differences due to sex linkage) means that purifying selection appears to  
716 set few limits to the variation in nucleotide substitution rate among satDNA families.  
717 Interestingly, 18 out of 20 shared satDNA families in *L. migratoria* showed  
718 amplification events giving rise to FISH bands, whereas only six out of their 14  
719 orthologous families in *O. decorus* did it. This reveals that many of these OSFs have  
720 shown highly different evolutionary paths in both species. Based on the MH hypothesis,  
721 we may speculate that the extreme demographic changes associated with locust

722 outbreaks in *L. migratoria* might have helped to spread individual satDNA sequences at  
723 the population level during the extreme bottlenecks that characterize the solitary phase  
724 and subsequent population expansions during the gregarious one. This issue needs  
725 further research, including quantitative population analyses of every satDNA family in  
726 this species.

727         In addition, selection can operate positively through non-phenotypic (i.e.,  
728 meiotic drive) or phenotypic (functional recruitment) effects, as is the case for  
729 centromeric and telomeric repeats. The latter is the extreme example of functional  
730 recruitment since the repeat is actively homogenized by an RNA-protein complex  
731 (telomerase) coded by the genome. Centromeric satDNA in primates resembles this  
732 kind of recruitment as another gene (CENPB) is involved in the organization of  
733 centromeric satDNA (Masumoto et al. 1989, 2004; Muro et al. 1992; Haaf et al. 1995).

734         Our model is an extension of the models devised in the '70s and '80s (Kimura  
735 and Ohta 1979; Ohta 1981, 1983; Ohta and Kimura 1981; Stephan 1986, 1987, 1989;  
736 Charlesworth et al. 1986), with some more emphasis on the intragenomic level, and  
737 under the light of the MH hypothesis (Lynch 2011; Lynch et al. 2011). Briefly,  
738 amplification is the homogenizing force, point mutation causes sequence degeneration,  
739 and new amplifications rejuvenate satDNA. We believe that our model brings about  
740 some essential term clarifications. For instance, Escudeiro et al. (2019) recently  
741 suggested a model of satDNA evolution in bovids consisting of three stages, namely  
742 amplification, degeneration (deduced from high satDNA similarity between some  
743 species and low between others) and homogenization (high sequence identity among all  
744 species). These authors thus claimed for degeneration and homogenization as if they  
745 were inter-specific processes. However, in our model, both processes are intragenomic  
746 (i.e., intra-specific) resulting from satDNA amplification and point mutation,

747 respectively, whereas inter-specific homogenization or degeneration is highly unlikely  
748 under contingent evolution. In fact, homogenization to an identical sequence in several  
749 species could only be achieved by functional (selective) recruit, as that occurred for the  
750 telomeric DNA repeat.

751         Finally, the paralogous nature of the satDNA library implies that its  
752 diversification between species is much slower than that of single-copy DNA, with high  
753 levels of incomplete library sorting which may be a problem for the use of satDNA for  
754 phylogenetical purposes beyond satDNA evolution itself. However, the pathway  
755 followed by an ancestor satDNA library after speciation can be monitored by  
756 satellitome comparison, as shown here for *O. decorus* and *L. migratoria*. A new body of  
757 research is taking form recently about contingency and determinism in evolution  
758 (Blount et al. 2018), trying to answer Gould's question on whether evolutionary  
759 trajectories are repeatable (Gould 1989). In this respect, satellitome evolution is a  
760 natural "parallel replay experiment" able to show many properties of contingent  
761 evolution, as the initially identical libraries in the ancestor undergo independent  
762 evolution after speciation reaching a high diversity of outcomes among different OSFs.  
763 Within species, the environment (at both intragenomic and population levels) is the  
764 same for all satDNA families (except for genomic location and organization), but the  
765 pathway followed by each of them is highly variable: some families show consensus  
766 sequences being highly similar to those in the other species, thus showing high ILibS,  
767 whereas others are completely sorted between species, and still others are  
768 unrecognizable between species because they have arisen *de novo* in one species or else  
769 they have undergone so many sequence changes that have lost homology between  
770 species. In analogy with Blount et al. (2018) claiming at ecological level, the  
771 evolutionary trajectory followed by each OSF in the satellitomes of two separate species

772 is mainly influenced by stochastic processes (i.e. mutation and drift), most likely  
773 reaching different outcomes even when both species satellitomes started from the same  
774 state in the ancestor and the different OSFs evolved under almost identical conditions at  
775 intragenomic level. Therefore, the satellitome is a good example of contingent evolution  
776 supporting that "disparate outcomes become more likely as the footprint of history  
777 grows deeper" (Blount et al. 2018). A rough estimate of the minimal degree of  
778 contingent evolution in the *O. decorus* and *L. migratoria* satellitomes can be obtained  
779 from the 20 orthologous satDNA pairs used here to estimate CTR. As Table 2 shows,  
780 only two of them showed identity higher than 95%: OdeSat17-176/LmiSat02-176  
781 showing a single nucleotide difference in their consensus sequences, and OdeSat59-  
782 185/LmiSat01A-185 showing two differences. The first pair showed homology with  
783 Helitron TEs which could have biased identity calculations, and the second one appears  
784 to have little to do with functional conservation (as explained above). Even assuming  
785 that these two cases are adaptive convergences (which is unlikely), we can estimate that  
786 satDNA evolution in these species was at least 90% contingent.

787

## 788 **Methods**

### 789 **Materials and sequencing**

790 We collected 21 males of the grasshopper *Oedaleus decorus* in Cortijo Shambala  
791 (Sierra Nevada, Granada, Spain; 36.96111 N, 3.33583 W) on 6 July 2015. They were  
792 anaesthetized with ethyl-acetate vapours prior to dissection, and testes were fixed in 3:1  
793 ethanol-acetic acid and stored at 4°C for subsequent fluorescent in situ hybridization  
794 (FISH) analysis. Body remains were immersed in liquid nitrogen and stored at -80 °C  
795 for molecular analysis and DNA sequencing. We then extracted genomic DNA from a  
796 hind leg from one male, using the GenElute Mammalian Genomic DNA Miniprep kit



797 (Sigma). Next we sent the purified DNA to Macrogen Inc. (South Korea) who built a  
798 genomic library with ~180 bp insert size, using the Illumina Truseq nano DNA kit, and  
799 sequenced it in an Illumina HiSeq2000 platform (2x101 nt) yielding about 9 Gb of reads.  
800 We deposited this library in the Sequence Read Archive (SRA) under accession number  
801 SRR9649806.

802 For the *Locusta migratoria* satellitome, we used the results generated in Ruiz-  
803 Ruano et al. (2016), including some new analyses of the same Illumina libraries  
804 obtained from a Spanish individual lacking B chromosomes (SRA library SRR2911427),  
805 satDNA FISH location, and their consensus sequences (GenBank accession numbers  
806 KU056702–KU056808). During these new analyses, we detected a previous mistake in  
807 the assembly of the LmiSat01A-193 subfamily, consisting of a false tandem duplication  
808 of 8 nt in the consensus monomer. We amended this mistake and renamed the (new)  
809 sequence as LmiSat01A-185 (GenBank accession number KU056702.2). We thus  
810 performed a new analysis of abundance and divergence for the whole satellitome,  
811 considering this modification that implied only slight changes.

812 In addition, we generated an Oxford Nanopore library for *L. migratoria* using  
813 the MinION system with a flow cell version R9. We constructed the library using 5 µg  
814 of DNA without fragmentation step applying the the Nanopore Genomic Kit version  
815 SQK-LSK108 and the CleanNGS magnetic beads for washes. After applying the  
816 localbase-calling program from Nanopore, we got 63,346 reads summing up 130 Mb  
817 (~0.02x of coverage).

818

### 819 **Bioinformatic and sequence analyses**

820 We characterized the *O. decorus* satellitome applying the satMiner protocol (Ruiz-  
821 Ruano et al. 2016). Briefly, this protocol begins with a run of RepeatExplorer (Novák et

822 al. 2013) and the elimination of homologous reads with Deconseq (Schmieder et al.  
823 2011) to perform a new round of RepeatExplorer with the remaining reads. We started  
824 with 100,000 read pairs and performed five additional rounds, subsequently duplicating  
825 the number of read pairs. Then we identified clusters in each RepeatExplorer round  
826 showing spherical or ring-shaped graphs, which are typical for satDNA. We checked the  
827 structure of their contigs with a dot-plot using Geneious v4.8.5 (Drummond et al. 2010)  
828 to test if they were tandemly repeated, and only those that met this condition were  
829 considered as satDNA. Every satDNA family was named with three letters alluding to  
830 species name (*L. migratoria* or *O. decorus*) followed by "Sat", a catalogue number (in  
831 decreasing order of abundance) and monomer length, following our previous suggestion  
832 in Ruiz-Ruano et al. (2016). For instance, the most abundant satDNA families in the  
833 two species analyzed here were LmiSat01-185 and OdeSat01-287. The different  
834 subfamilies within a same family were alphabetically named with capital letters in order  
835 of decreasing abundance.

836         Considering their level of sequence identity, we classified every collection of  
837 homologous sequences into subfamilies (identity>95%), families (>80%), and  
838 superfamilies (>40%). Next, we randomly selected 5 million read pairs with SeqTK  
839 (<https://github.com/lh3/seqtk>) and aligned them against the reference sequences with  
840 RepeatMasker v4.0.5 (Smit et al. 2013). With these results, we estimated total  
841 abundance and average divergence and generated a repeat landscape. Finally, we  
842 numbered the satellite families in descending order of abundance. We deposited  
843 sequences for satellite DNAs characterized in *O. decorus* in GenBank with accession  
844 numbers MT009035 - MT009125.

845         We then searched for homology between *L. migratoria* and *O. decorus*  
846 satellitomes with the `rm_homolgy` script (Ruiz-Ruano et al. 2016) that makes all-to-all

847 alignments with RepeatMasker (Smit et al. 2013). We aligned homologous satellites  
848 with Muscle v3.6 (Edgar 2004) implemented in Geneious v4.8.5 (Drummond et al.  
849 2010) and reviewed them manually. Then we generated minimum spanning trees (MST)  
850 with Arlequin v3.5 (Excoffier and Lischer 2010) and visualized them with HapStar v0.7  
851 (Teacher and Griffiths 2011). We used the same alignments to estimate the divergence  
852 between satDNA families of *L. migratoria* and *O. decorus*. To estimate a consensus  
853 turnover rate (CTR) of satDNA sequences, we performed alignments of consensus  
854 sequences using ClustalX (Thompson et al. 1997). Sequence divergence between  
855 species was calculated according to the Kimura two-parameter model (K2P; Kimura  
856 1980), using MEGA6 (Tamura et al. 2013). When orthologous satDNA families were  
857 composed of several subfamilies, all consensus sequences from each subfamily were  
858 aligned and the average of all pairwise distances between the two species was computed.  
859 Finally, CTR was calculated using the  $CTR = K/2T$  equation, where T= divergence time  
860 between species and K= K2P divergence (Kimura 1980). Turnover rates were estimated  
861 considering that the *Oedaleus* and *Locusta* genera split 22.81 Ma (Song et al. 2015).

862 To get some insights on array length, we analyzed our MinION library obtained  
863 from *L. migratoria* gDNA (see above). For this purpose, we performed an alignment of  
864 these reads against the consensus sequences of the *L. migratoria* satellitome using  
865 RepeatMasker (Smit et al. 2013). However, due to the lack of resolution at subfamily  
866 level due to the high level of sequencing errors in these long reads, we only performed  
867 this analysis only for the most abundant subfamily in each family, i.e, that noted with  
868 the letter “A”. We then analyzed the length of all arrays found for each family to  
869 recorded the maximum array length (MAL) for subsequent analysis. For this purpose,  
870 we only considered arrays showing length higher than 1.5 repeat units, i.e. at least  
871 dimers, and the observed figures for MAL in the 56 satDNA families analyzed in *L.*

872 *migratoria* ranged between 62 and 20,180 repeat units. In addition, we considered 3 nt  
873 as the maximum inter-array distance to collapse two consecutive TR arrays into a same  
874 array, in order to partly counteract the splitting effect of short insertions or deletions due  
875 to replication slippage. These calculations were implemented in a custom script  
876 ([https://github.com/mmarpe/satION/blob/master/dis\\_bed\\_max.py](https://github.com/mmarpe/satION/blob/master/dis_bed_max.py)).

877

### 878 **Analysis of tandem structure**

879 We developed a method to estimate the degree of tandem structure in satDNA using a  
880 pipeline that we made publicly available throughout repository  
881 (<https://github.com/fjruirozano/SatIntExt>). This method is based on scoring the number  
882 of Illumina read pairs containing repeat units for a given satDNA family in the two  
883 reads (onwards named "homogeneous read pairs") and the number of read pairs  
884 containing such a repeat in only one member of the read pair (onwards named  
885 "heterogeneous read pairs"). The proportion of homogeneous read pairs indicates the  
886 degree at which a satDNA family is tandemly structured (tandem structure index = TSI).  
887 This index underestimates the true value by the equivalent to the half of the number of  
888 arrays (since each array has two external units). However, as the number of repeat units  
889 is much higher than the number of arrays, we consider that this underestimation may be  
890 low at the genomic level. To validate TSI, we analyzed Oxford Nanopore MinION long  
891 reads in *L. migratoria*, by annotating all satDNA variants found in them and scoring the  
892 number of repeat units constituting the longest array found for each satDNA family.  
893 Despite low coverage of the MinION reads, these longest arrays showed significant  
894 positive correlation with TSI (Spearman rank correlation:  $r_s = 0.42$ ,  $N = 55$ ,  $t = 3.36$ ,  $P =$   
895  $0.001$ ), indicating that TSI is a valid estimator for the degree of tandem structure of  
896 satDNA. In addition, we tried to annotate the external read of every heterogeneous read

897 pair with the database of repetitive elements of *L. migratoria* generated in Ruiz-Ruano  
898 et al. (2018b) with RepeatMasker. Thus, we found homology of the elements adjacent  
899 to the satDNA arrays with satDNAs, transposable elements, rDNAs, snDNAs, tRNAs,  
900 histones, mitochondrial DNA and unknown elements in some read pairs, and counted  
901 the number of occurrences. This analysis is also integrated in the above-mentioned  
902 pipeline.

903

#### 904 **Homogenization and degeneration indices**

905 SatDNA homogenization, i.e., the degree of intraspecific similarity between its  
906 tandemly structured monomers, is conceptually inverse to average sequence divergence.  
907 Therefore, a homogenization index should be negatively correlated with the K2P  
908 divergence. Trying to get such an index, we built repeat landscapes for each satDNA  
909 subfamily (90 in *O. decorus* and 103 in *L. migratoria*) and searched for divergence  
910 peaks, i.e., those divergence values showing the highest abundance in the repeat  
911 landscape (DIVPEAK) (Fig. 1). Then, we summed up the abundances of all satDNA  
912 sequences at  $\pm 2\%$  divergence from the DIVPEAK class to calculate abundance in the  
913 5% peak or PEAK-SIZE (Fig. 1). The logic was to get a collection of sequences  
914 diverging 5% or less to the consensus sequence, thus coinciding with our criterion to  
915 define subfamilies, as they probably derived from the same amplification event (see  
916 Ruiz-Ruano et al. 2016 for details). Finally, we calculated relative peak size (RPS) as  
917 the quotient between PEAK-SIZE and total abundance (see Fig. 1), which measures the  
918 proportion of repeat units being part of the last amplification event. To calculate RPS at  
919 the family level in those families showing two or more subfamilies, we followed the  
920 same procedure including all subfamily satDNA sequences, so that each subfamily  
921 weighted in proportion to its abundance. RPS serves as an index of homogenization

922 because it is expected to increase with satDNA amplification, as the new units derived  
923 from tandem duplication will initially show identical sequences, thus increasing global  
924 identity. DIVPEAK serves as an index of degeneration because it will increase by  
925 mutation accumulation and is thus proportional to the time passed since the last  
926 amplification. Specifically, DIVPEAK is the value of divergence (from 0% onwards) at  
927 which a given satDNA shows its maximum abundance, and increases when mutational  
928 decay move its abundance peak away from complete homogenization (divergence=0)  
929 where it arrived after its last major amplification event. The values for average  
930 divergence, total abundance, maximum abundance, maximum divergence, RPS and  
931 DIVPEAK for every satDNA family were estimated from with a custom script using the  
932 divsum files from RepeatMasker  
933 ([https://github.com/fjruiroz/SatIntExt/blob/main/divsum\\_stats.py](https://github.com/fjruiroz/SatIntExt/blob/main/divsum_stats.py)).

934

### 935 **Concerted evolution index and incomplete library sorting**

936 We calculated the divergence at intra- ( $K2P_{intra}$ ) and inter-specific ( $K2P_{inter}$ ) levels for  
937 the 20 pairs of orthologous satDNA families, and calculated an index of concerted  
938 evolution (CEI) as  $\log_2$  the  $K2P_{inter}/K2P_{intra}$  quotient.

939 The comparative analysis of RLs and MSTs revealed that the observed  
940 differences between OSFs in CTR were due to the state of library sorting between  
941 species. On this basis, we observed that the OSF showing the highest CTR was that  
942 showing a best separation between species for all families and subfamilies of satDNA.  
943 We then gave 1 to the sorting state of this OSF and then divided all CTR values by this  
944 maxCTR to obtain an index of the relative sorting for each OSF. One minus the  
945 obtained value thus indicated the degree of incomplete library sorting (ILibS) for each  
946 OSF.

947

## 948 **Analysis of conserved motifs and curvature**

949 We analyzed the consensus sequences of shared and non-shared satDNAs between the  
950 two species looking for functional signatures. We used the ETANDEM, EINVERTED,  
951 and PALINDROME programs from the EMBOSS suite of bioinformatics tools (Rice et  
952 al. 2000) for the detection of internal repeats (direct or inverted) and palindromes. Short  
953 internal direct repeats indicate the presence of functional motifs within the satDNA  
954 repeats. Dyad symmetries, many of them associated with thermodynamically stable  
955 secondary structures, are predicted to adopt non-B DNA conformations, such as stem-  
956 loops or cruciforms, which might have a role as targets for protein binding. Thus, as an  
957 additional test on the propensity to form non-B DNA conformations, we checked all  
958 satDNA families using the Mfold web server  
959 (<http://www.unafold.org/mfold/applications/rna-folding-form-v2.php>) for nucleic acid  
960 folding prediction (Zuker 2003), estimating Gibbs free energy (dG) of the predicted  
961 secondary structures (SantaLucia, Jr 1998). We also checked the consensus sequences  
962 of both types of satDNAs for sequence-dependent bendability/curvature propensity of  
963 repeats. We produced the bendability/curvature propensity plots with the bend.it server  
964 at [http://pongor.itk.ppke.hu/dna/bend\\_it.html#/bendit\\_intro](http://pongor.itk.ppke.hu/dna/bend_it.html#/bendit_intro) (Vlahovicek et al. 2003),  
965 using the DNase I based bendability parameters of Brukner et al. (1995) and the  
966 consensus bendability scale (Gabrielian and Pongor 1996). Finally, we used the sliding  
967 windows option of the DnaSP v.5.10 program (Librado and Rozas 2009) for the  
968 analysis of nucleotide diversity ( $\pi$ ) per position for every shared satDNA in order to  
969 detect DNA conserved motifs. For this, we use multiple alignments of several dozens of  
970 monomer repeats selected per each satDNA.

971

972 **Chromosomal location of the *O. decorus* satDNAs**

973 To compare the chromosomal location of orthologous satDNA families in these species,  
974 we performed fluorescent in situ hybridization (FISH) for 14 satDNA families in *O.*  
975 *decorus* which showed sequence homology with 20 families in *L. migratoria*. For this  
976 purpose, we designed divergent primers for these 14 satDNA families in *O. decorus*  
977 using Primer3 (Untergasser et al. 2012) with a  $T_m \sim 60$  °C, to generate FISH probes as  
978 described in Cabrero et al. (2003) and Ruiz-Ruano et al. (2016).

979

980 **Statistical analysis**

981 To investigate distribution fitting of RPS and DIVPEAK, we used the chi-square test,  
982 and the normality of other variable distributions was tested by the Shapiro-Wilks test,  
983 and, when this condition was not met, we used the non-parametric Spearman rank  
984 correlation test. In the case of turnover rate, we performed forward stepwise multiple  
985 regression to analyze its dependence on other variables. In this case, we calculated  
986 variance inflation factors (VIFs) to test for multicollinearity, and the fit of standardized  
987 residuals of this regression to a normal distribution was tested by means of the Shapiro-  
988 Wilks test. All these analyses were performed using the Statistica software (Statsoft  
989 Inc.). Two-group comparisons were performed by the Gardner-Altman estimation plot  
990 method devised by Ho et al. (2019) following the design in Gardner and Altman (1986),  
991 as implemented in <https://www.estimationstats.com>. This analysis calculates the effect  
992 size by the mean difference between groups, for independent samples, or else by the  
993 paired mean difference in case of paired samples. The effect size is then evaluated by  
994 the 95% confidence interval (95% CI) and whether it includes or not the zero value.  
995 Contingency tests were performed by the RXC program, which employs the Metropolis



996 algorithm to obtain an unbiased estimate of the exact p-value (Rousset and Raymond  
997 1995). In all cases 20 batches of 2,500 replicates were performed.

998

## 999 **Abbreviations**

1000 B-pattern: Banded pattern (pattern in FISH analyses)  
1001 CEI: Concerted Evolution Index  
1002 CI: Confidence Interval  
1003 CTR: Consensus Turnover Rate  
1004 dG: Gibbs free energy  
1005 DIVPEAK: Divergence Peak  
1006 FISH: Fluorescence *In Situ* Hybridization  
1007 ILibS: Incomplete Library Sorting  
1008 K2P: Kimura Two-Parameter (substitution model)  
1009 Lmi: *Locusta migratoria*  
1010 NS-pattern: No signal pattern (in FISH analyses)  
1011 MAL: Maximum Array Length (observed in MinIon reads of *L. migratoria*)  
1012 MST: Minimum Spanning Tree  
1013 Ode: *Oedaleus decorus*  
1014 OSF: Orthologous Superfamily  
1015 RL: Repeat Landscape  
1016 RPS: Relative peak size  
1017 RUL: Repeat Unit Length  
1018 satDNA: satellite DNA  
1019 SF: Superfamily  
1020 TSI: Tandem Structure Index

1021 VIF: Variance inflation factors

1022

1023 **Declarations**

1024 **Ethics approval and consent to participate**

1025 Not applicable

1026 **Consent for publication**

1027 Not applicable

1028 **Availability of data and materials**

1029 The Illumina libraries used for this article are available in the Sequence Read Archive  
1030 (SRA) with accession numbers SRR9649806 and SRR2911427. Main data generated or  
1031 analyzed during this study are included in this published article and its supplementary  
1032 information files. The remaining datasets can be requested to the corresponding author.

1033 **Competing interests**

1034 The authors declare no competing interests.

1035 **Funding**

1036 FJRR was also supported by a postdoctoral fellowship from Sven och Lilly Lawskis  
1037 fond (Sweden) and a Marie Skłodowska-Curie Individual Fellowship (grant agreement  
1038 875732, European Union).

1039 **Authors' contributions**

1040 Conceptualization: JPMC, JC, MDLL, MMP, FP, MAGR, FJRR; experimental  
1041 design: JPMC, JC, MDLL, MMP, FP, MAGR, FJRR; sampling: JPMC and JC;  
1042 cytogenetic analyses: JPMC, JC, MDLL; data analysis: JPMC, MMP, MAGR, FJRR.  
1043 All authors read and approved the manuscript.

1044

1045

## 1046 **References**

- 1047 Arnason U, Grettarsdottir S, Widegren B. Mysticete (baleen whale) relationships based  
1048 upon the sequence of the common cetacean DNA satellite. *Mol. Biol. Evol.* 1992,  
1049 9, 1018–1028.
- 1050 Blount ZD, Lenski RE, Losos JB. Contingency and determinism in evolution:  
1051 Replaying life’s tape. *Science*. 2018;362(6415).  
1052 <https://doi.org/10.1126/science.aam5979>
- 1053 Brajković J, Feliciello I, Bruvo-Madžarić B, Ugarković Đ. Satellite DNA-like elements  
1054 associated with genes within euchromatin of the beetle *Tribolium castaneum*. *G3:  
1055 Genes, Genomes, Genetics*. 2012;2:931–941.
- 1056 Brukner I, Sanchez R, Suck D, Pongor S. Sequence-dependent bending propensity of  
1057 DNA as revealed by DNase I: parameters for trinucleotides. *The EMBO journal*.  
1058 1995;14(8):1812–1818.
- 1059 Cabrero J, Bakkali M, Bugrov A, Warchalowska-Sliwa E, López-León MD, Perfectti F,  
1060 Camacho JPM. Multiregional origin of B chromosomes in the grasshopper  
1061 *Eyprepocnemis plorans*. *Chromosoma*. 2003;112(4):207–211.  
1062 <https://doi.org/10.1007/s00412-003-0264-2>
- 1063 Cafasso D, Chinali G. An ancient satellite DNA has maintained repetitive units of the  
1064 original structure in most species of the living fossil plant genus *Zamia*. *Genome*  
1065 2014;57:125–135.
- 1066 Charlesworth B, Langley CH, Stephan W. The evolution of restricted recombination  
1067 and the accumulation of repeated DNA sequences. *Genetics*. 1986;112(4):947–962.
- 1068 Cohen S, Agmon N, Yacobi K, Mislovati M, Segal D. Evidence for rolling circle  
1069 replication of tandem genes in *Drosophila*. *Nucleic Acids Research*.  
1070 2005;33(14):4519–4526. <https://doi.org/10.1093/nar/gki764>

- 1071 Cohen S, Agmon N, Sobol O, Segal D. Extrachromosomal circles of satellite repeats  
1072 and 5S ribosomal DNA in human cells. *Mobile DNA*. 2010;1:11.  
1073 <https://doi.org/10.1186/1759-8753-1-11>
- 1074 de la Herrán R, Fontana F, Lanfredi M, Congiu L, Leis M, Rossi R, Ruiz Rejón C, Ruiz  
1075 Rejón M, Garrido-Ramos MA.. Slow rates of evolution and sequence  
1076 homogenization in an ancient satellite DNA family of sturgeons. *Molecular  
1077 Biology and Evolution*. 2001a;18(3):432–436.
- 1078 de La Herrán R, Ruiz Rejón C, Ruiz Rejón M, Garrido-Ramos MA. The molecular  
1079 phylogeny of the Sparidae (Pisces, Perciformes) based on two satellite DNA  
1080 families. *Heredity*. 2001b;87(6):691–697.
- 1081 Djupedal I, Kos-Braun IC, Mosher RA, Söderholm N, Simmer F, Hardcastle TJ, Fender  
1082 A, Heidrich N, Kagansky A, Bayne E, et al. Analysis of small RNA in fission yeast;  
1083 centromeric siRNAs are potentially generated through a structured RNA. *EMBO J*.  
1084 2009;28:3832–3844.
- 1085 Dover G. Molecular drive: a cohesive mode of species evolution. *Nature*.  
1086 1982a;299:111–117.
- 1087 Dover G. A molecular drive through evolution. *Bioscience*. 1982b;32(6):526–33.
- 1088 Drummond AJ, Ashton B, Buxton S, Cheung M, Cooper A, Heled J, Kearse M, Moir R,  
1089 Stones-Havas S, Sturrock S, Thierer T, Wilson A. Geneious v. 4.8. Auckland, New  
1090 Zealand: Biomatters Ltd. 2010.
- 1091 Edgar RC. MUSCLE: multiple sequence alignment with high accuracy and high  
1092 throughput. *Nucleic acids research*. 2004;32(5):1792–1797.
- 1093 Eirín-López JM, Rebordinos L, Rooney AP, Rozas J. The birth- and-death evolution of  
1094 multigene families revisited. In: Garrido-Ramos MA, editor. *Repetitive DNA*.  
1095 Basel: S. Karger AG; 2012. p. 170–196.

- 1096 Escudeiro A, Adegas F, Robinson TJ, Heslop-Harrison JS, Chaves R. Conservation,  
1097 divergence and functions of centromeric satellite DNA families in the Bovidae.  
1098 *Genome Biology and Evolution*, 2019;11(4):1152–1165.  
1099 <https://doi.org/10.1093/gbe/evz061>
- 1100 Excoffier L, Lischer HE. Arlequin suite ver 3.5: a new series of programs to perform  
1101 population genetics analyses under Linux and windows. *Mol Ecol Resour.*  
1102 2010;10:564–567. doi:10.1111/j.1755-0998.2010.02847.x
- 1103 Fachinetti D, Han JS, McMahon MA, Ly P, Abdullah A, Wong AJ, Cleveland DW.  
1104 DNA sequence-specific binding of CENP-B enhances the fidelity of human  
1105 centromere function. *Dev. Cell.* 2015;33:314–327.
- 1106 Fry K, Salser W. Nucleotide sequences of HS- $\alpha$  satellite DNA from kangaroo rat  
1107 *dipodomys ordii* and characterization of similar sequences in other rodents. *Cell.*  
1108 1977;12(4):1069–1084. [https://doi.org/10.1016/0092-8674\(77\)90170-2](https://doi.org/10.1016/0092-8674(77)90170-2)
- 1109 Gabrielian A, Pongor S. Correlation of intrinsic DNA curvature with DNA property  
1110 periodicity. *FEBS letters.* 1996;393(1):65–68.
- 1111 Gabrielian A, Simoncsits A, Pongor S. Distribution of bending propensity in DNA  
1112 sequences. *FEBS letters.* 1996;393(1):124–130.
- 1113 Gardner MJ, Altman DG. Confidence intervals rather than P values: estimation rather  
1114 than hypothesis testing. *Br Med J.* 1986;292:746–750.
- 1115 Garrido-Ramos MA, Jamilena M, Lozano R, Ruiz Rejón C, Ruiz Rejón M. The EcoRI  
1116 centromeric satellite DNA of the Sparidae family (Pisces, Perciformes) contains a  
1117 sequence motive common to other vertebrate centromeric satellite DNAs.  
1118 *Cytogenet. Cell. Genet.* 1995;71:345–351.

- 1119 Garrido-Ramos MA, de la Herran R, Jamilena M, Lozano R, Ruiz Rejón C, Ruiz Rejón  
1120 M. Evolution of centromeric satellite-DNA and its use in phylogenetic studies of  
1121 the Sparidae family (Pisces, Perciformes). *Mol. Phyl. Evol.* 1999;12:200–204.
- 1122 Garrido-Ramos MA. Satellite DNA in Plants: More than Just Rubbish. *Cytogenetic and*  
1123 *Genome Research.* 2015;146(2):153–170. <https://doi.org/10.1159/000437008>
- 1124 Garrido-Ramos MA. Satellite DNA: An evolving topic. *Genes.* 2017;8(9):230.  
1125 <https://doi.org/10.3390/genes8090230>
- 1126 Goodsell DS, Dickerson RE. Bending and curvature calculations in B-DNA. *Nucleic*  
1127 *acids research.* 1994;22(24):5497–5503.
- 1128 Gould SJ. *Wonderful life: the Burgess Shale and the nature of history.* Norton, New  
1129 York; 1989.
- 1130 Haaf T, Mater AG, Wienberg J, Ward DC. Presence and abundance of CENP-B box  
1131 sequences in great ape subsets of primate-specific alpha-satellite DNA. *J. Mol.*  
1132 *Evol.* 1995;41:487–491.
- 1133 Hall SE, Kettler G, Preuss D. Centromere satellites from Arabidopsis populations:  
1134 maintenance of conserved and variable domains. *Genome research.*  
1135 2003;13(2):195–205.
- 1136 Harding RM, Boyce AJ, Clegg JB. The evolution of tandemly repetitive DNA:  
1137 recombination rules. *Genetics.* 1992;132(3):847–859.
- 1138 Ho J, Tumkaya T, Aryal S, Choi H, Claridge-Chang A. Moving beyond P values: data  
1139 analysis with estimation graphics. *Nature Methods.* 2019;16(7):565–566.  
1140 <https://doi.org/10.1038/s41592-019-0470-3>
- 1141 Iwata A, Tek AL, Richard MM, Abernathy B, Fonsêca A, Schmutz J, Chen NWG,  
1142 Thureau V, Magdelenat G, Li Y, Murata M, Pedrosa-Harand A, Geffroy V, Nagaki

- 1143 K, Jackson SA. Identification and characterization of functional centromeres of the  
1144 common bean. *The Plant Journal*. 2013;76(1):47–60.
- 1145 Kasinathan S, Henikoff S. Non-B-form DNA is enriched at centromeres. *Molecular*  
1146 *Biology and Evolution*. 2018;35(4):949–962.  
1147 <https://doi.org/10.1093/molbev/msy010>
- 1148 Kimura M, Ohta T. Population genetics of multigene family with special reference to  
1149 decrease of genetic correlation with distance between gene members on a  
1150 chromosome. *Proc Nat Acad Sci USA*. 1979;76(8):4001–4005.
- 1151 Kimura M. A simple method for estimating evolutionary rates of base substitutions  
1152 through comparative studies of nucleotide sequences. *Journal of molecular*  
1153 *evolution*. 1980;16(2):111–120.
- 1154 Kit S. Equilibrium sedimentation in density gradients of DNA preparations from animal  
1155 tissues. *Journal of Molecular Biology*. 1961;3(6):711–716.  
1156 [https://doi.org/10.1016/S0022-2836\(61\)80075-2](https://doi.org/10.1016/S0022-2836(61)80075-2)
- 1157 Koch J. Neocentromeres and alpha satellite: a proposed structural code for functional  
1158 human centromere DNA. *Human molecular genetics*. 2000;9(2):149–154.
- 1159 Kuhn GCS, Küttler H, Moreira-Filho O, Heslop-Harrison JS. The 1.688 repetitive DNA  
1160 of drosophila: Concerted evolution at different genomic scales and association with  
1161 genes. *Molecular Biology and Evolution*. 2012;29(1):7–11.  
1162 <https://doi.org/10.1093/molbev/msr173>
- 1163 Librado P, Rozas J. DnaSP v5: a software for comprehensive analysis of DNA  
1164 polymorphism data. *Bioinformatics*. 2009;25(11):1451–1452.
- 1165 Lorite P, Muñoz-López M, Carrillo JA, Sanllorente O, Vela J, Mora P, Tinaut A, Torres  
1166 MI, Palomeque T. Concerted evolution, a slow process for ant satellite DNA: study

- 1167 of the satellite DNA in the *Aphaenogaster* genus (Hymenoptera, Formicidae).  
1168 Organisms Diversity & Evolution. 2017;17(3):595–606.
- 1169 Luchetti A, Cesari M, Carrara G, Cavicchi S, Passamonti M, Scali V, Mantovani B.  
1170 Unisexuality and molecular drive: Bag320 sequence diversity in *Bacillus* taxa  
1171 (Insecta Phasmatodea). Journal of molecular evolution. 2003;56(5):587–596.
- 1172 Luchetti A, Marini M, Mantovani B. Non-concerted evolution of the RET76 satellite  
1173 DNA family in *Reticulitermes* taxa (Insecta, Isoptera). Genetica. 2006;128:123–  
1174 132.
- 1175 Lynch M. Statistical inference on the mechanisms of genome evolution. PLoS Genetics.  
1176 2011;7(6):1–4. <https://doi.org/10.1371/journal.pgen.1001389>
- 1177 Lynch M, Bobay L-M, Catania F, Gout J-F, Rho M. The Repatterning of Eukaryotic  
1178 Genomes by Random Genetic Drift. Annu Rev Genomics Hum Genet.  
1179 2011;12:347–366. <https://doi.org/10.1146/annurev-genom-082410-101412>
- 1180 Masumoto H, Masukata H, Muro Y, Nozaki N, Okazaki T. A human centromere  
1181 antigen (CENP-B) interacts with a short specific sequence in alphoid DNA, a  
1182 human centromeric satellite. J. Cell Biol. 1989;109:1963–1973.
- 1183 Masumoto H, Nakano M, Ohzeki J. The role of CENP-B and alpha-satellite DNA: De  
1184 novo assembly and epigenetic maintenance of human centromeres. Chromosome  
1185 Res. 2004;12:543–556.
- 1186 Melters DP, Bradnam KR, Young HA, Telis N, May MR, Ruby JG, Sebra R, Peluso P,  
1187 Eid J, Rank D, Garcia JF. Genome Biol. 2013;14:R10.
- 1188 Meštrović N, Mravinac B, Pavlek M, Vojvoda-Zeljko T, Šatović E, Plohl M. Structural  
1189 and functional liaisons between transposable elements and satellite DNAs.  
1190 Chromosome Research. 2015;23(3):583–596. <https://doi.org/10.1007/s10577-015->  
1191 9483-7



- 1192 Mravinac B, Plohl M, Meštrović N, Ugarković Đ. Sequence of PRAT satellite DNA  
1193 “frozen” in some Coleopteran species. *J. Mol. Evol.* 2002;54:774–783.
- 1194 Mravinac B, Plohl M, Ugarković Đ. Preservation and high sequence conservation of  
1195 satellite DNAs suggest functional constraints. *J. Mol. Evol.* 2005;61:542–550.
- 1196 Muro Y, Masumoto H, Yoda K, Nozaki N, Ohashi M, Okazaki T. Centromere protein B  
1197 assembles human centromeric alpha-satellite DNA at the 17-bp sequence, CENP-B  
1198 box. *J Cell Biol.* 1992;116:585–596.
- 1199 Navajas-Perez R, de la Herrán R, Jamilena M, Lozano R, Ruiz Rejon C, Ruiz Rejon M,  
1200 Garrido-Ramos MA. Reduced rates of sequence evolution of Y-linked satellite  
1201 DNA in *Rumex* (Polygonaceae). *Journal of molecular evolution.* 2005;60(3):391–  
1202 399.
- 1203 Navajas-Pérez R, Schwarzacher T, de la Herrán R, Ruiz Rejón C, Ruiz Rejón M,  
1204 Garrido-Ramos MA. The origin and evolution of the variability in a Y-specific  
1205 satellite-DNA of *Rumex acetosa* and its relatives. *Gene.* 2006;368:61–71.
- 1206 Navajas-Pérez R, Quesada del Bosque ME, Garrido-Ramos MA. Effect of location,  
1207 organization, and repeat-copy number in satellite-DNA evolution. *Molecular*  
1208 *Genetics and Genomics.* 2009;282(4):395–406.
- 1209 Nei M, Rooney AP. Concerted and birth-and-death evolution of multigene families.  
1210 *Annu Rev Genet.* 2005;39:121–152.
- 1211 Neumann P, Navrátilová A, Schroeder-Reiter E, Koblížková A, Steinbauerová V,  
1212 Chocholová E, Novák P, Wanner G, Macas J. Stretching the rules: monocentric  
1213 chromosomes with multiple centromere domains. *PLoS Genet.*  
1214 2012;8(6):e1002777.

- 1215 Novák P, Neumann P, Pech J, Steinhaisl J, Macas J. RepeatExplorer: a Galaxy-based  
1216 web server for genome-wide characterization of eukaryotic repetitive elements  
1217 from next-generation sequence reads. *Bioinformatics*. 2013;29:792–793.
- 1218 Ohta T. Genetic variation in small multigene families. *Genetical Research*.  
1219 1981;37(2):133–149. <https://doi.org/10.1017/S0016672300020115>
- 1220 Ohta T. On the evolution of multigene families. *Theoretical Population Biology*.  
1221 1983;23(2):216–240. [https://doi.org/10.1016/0040-5809\(83\)90015-1](https://doi.org/10.1016/0040-5809(83)90015-1)
- 1222 Ohta T, Kimura M. Some calculations on the amount of selfish DNA. *Proc Natl Acad*  
1223 *Sci USA*. 1981;78:1129–1132. doi: 10.1073/pnas.78.2.1129.
- 1224 Pavlek M, Gelfand Y, Plohl M, Meštrović N. Genome-wide analysis of tandem repeats  
1225 in *Tribolium castaneum* genome reveals abundant and highly dynamic tandem  
1226 repeat families with satellite DNA features in euchromatic chromosomal arms.  
1227 *DNA Research*. 2015;22(6):387–401. <https://doi.org/10.1093/dnares/dsv021>
- 1228 Pezer Ž, Brajković J, Felicciello I, Ugarković Đ. Satellite DNA-mediated effects on  
1229 genome regulation. *Repetitive DNA*. 2012;7:153–169.
- 1230 Plohl M, Meštrović N, Mravinac B. Satellite DNA evolution. In: Garrido-Ramos MA,  
1231 editor. *Repetitive DNA*. Basel: S. Karger AG; 2012. p. 126–152.
- 1232 Quesada del Bosque ME, López-Flores I, Suárez-Santiago VN, Garrido-Ramos MA.  
1233 Differential spreading of Hin fl satellite DNA variants during radiation in  
1234 *Centaureinae*. *Annals of botany*. 2013;112(9):1793–1802.
- 1235 Quesada del Bosque ME, López-Flores I, Suárez-Santiago VN, Garrido-Ramos MA.  
1236 Satellite-DNA diversification and the evolution of major lineages in *Cardueae*  
1237 (*Carduoideae Asteraceae*). *Journal of plant research*. 2014;127(5):575–583.
- 1238 Rice P, Longden I, Bleasby A. EMBOSS: the European molecular biology open  
1239 software suite. *Trends in genetics*. 2000;16(6):276–277.

- 1240 Robles F, de la Herrán R, Ludwig A, Ruiz Rejón C, Ruiz Rejón M, Garrido-Ramos MA.  
1241 Evolution of ancient satellite DNAs in sturgeon genomes. *Gene*. 2004;338:133–  
1242 142.
- 1243 Rousset F, Raymond M. Testing heterozygote excess and deficiency. *Genetics*  
1244 1995;140:1413–1419.
- 1245 Ruiz-Ruano FJ, López-León MD, Cabrero J, Camacho JPM. High-throughput analysis  
1246 of the satellitome illuminates satellite DNA evolution. *Scientific Reports*.  
1247 2016;6:28333. <https://doi.org/10.1038/srep28333>
- 1248 Ruiz-Ruano FJ, Cabrero J, López-León MD, Camacho JPM. Satellite DNA content  
1249 illuminates the ancestry of a supernumerary (B) chromosome. *Chromosoma*.  
1250 2017;126:487–500. <https://doi.org/10.1007/s00412-016-0611-8>
- 1251 Ruiz-Ruano FJ, Castillo-Martínez J, Cabrero J, Gómez R, Camacho JPM, López-León  
1252 MD. High-throughput analysis of satellite DNA in the grasshopper *Pyrgomorpha*  
1253 *conica* reveals abundance of homologous and heterologous higher-order repeats.  
1254 *Chromosoma*. 2018a;127(3):323–340. <https://doi.org/10.1007/s00412-018-0666-9>
- 1255 Ruiz-Ruano FJ, Cabrero J, López-León MD, Sánchez A, Camacho JPM. Quantitative  
1256 sequence characterization for repetitive DNA content in the supernumerary  
1257 chromosome of the migratory locust. *Chromosoma*. 2018b;127(1):45–57.
- 1258 SantaLucia Jr J. A unified view of polymer, dumbbell, and oligonucleotide DNA  
1259 nearest-neighbor thermodynamics. *Proceedings of the National Academy of*  
1260 *Sciences*. 1998;95(4):1460–1465.
- 1261 Šatović E, Plohl M. Tandem Repeat-Containing MITEs in the Clam *Donax trunculus*.  
1262 *Genome Biology and Evolution*. 2013;5(12):2549–2559.  
1263 <https://doi.org/10.1093/gbe/evt202>

- 1264 Šatović E, Vojvoda Zeljko T, Luchetti A, Mantovani B, Plohl M. Adjacent sequences  
1265 disclose potential for intra-genomic dispersal of satellite DNA repeats and suggest  
1266 a complex network with transposable elements. *BMC Genomics*. 2016;17(1):997.  
1267 <https://doi.org/10.1186/s12864-016-3347-1>
- 1268 Schmieder R, Edwards R. Fast identification and removal of sequence contamination  
1269 from genomic and metagenomic datasets. *PLoS One*. 2011;6:e17288.
- 1270 Schueler MG, Swanson W, Thomas PJ. NISC Comparative Sequencing Program &  
1271 Green, E.D. Adaptive evolution of foundation kinetochore proteins in primates.  
1272 *Mol. Biol. Evol.* 2010;27:1585–1597.
- 1273 Shang WH, Hori T, Toyoda A, Kato J, Popendorf K, Sakakibara Y, Fujiyama A,  
1274 Fukagawa T. Chickens possess centromeres with both extended tandem repeats  
1275 and short non-tandem-repetitive sequences. *Genome research*. 2010;20(9):1219–  
1276 1228.
- 1277 Smit AFA, Hubley R, Green P (2013) RepeatMasker Open-4.0.  
1278 <http://www.repeatmasker.org>
- 1279 Smith G P. Evolution of repeated DNA sequences by unequal crossover. *Science*.  
1280 1976;191(4227):528–535. <https://doi.org/10.1126/science.1251186>
- 1281 Song H, Amédégnato C, Cigliano MM, Desutter-Grandcolas L, Heads SW, Huang Y,  
1282 Otte D, Whiting MF. 300 million years of diversification: elucidating the patterns  
1283 of orthopteran evolution based on comprehensive taxon and gene sampling.  
1284 *Cladistics*. 2015;31:621–651. <https://doi.org/https://doi.org/10.1111/cla.12116>
- 1285 Stephan W. Recombination and the evolution of satellite DNA. *Genet. Res.*  
1286 1986;47:167–174.
- 1287 Stephan W. Quantitative variation and chromosomal location of satellite DNAs. *Genet.*  
1288 *Res.* 1987;50(1):41–52.

- 1289 Stephan W. Tandem-repetitive non coding DNA: forms and forces. *Molecular Biology*  
1290 *and Evolution*. 1989;6(2):198–212.  
1291 <https://doi.org/10.1093/oxfordjournals.molbev.a040542>
- 1292 Stephan W, Cho S. Possible role of natural selection in the formation of tandem-  
1293 repetitive noncoding DNA. *Genetics*. 1994;136:333–341.
- 1294 Suárez-Santiago VN, Blanca G, Ruiz-Rejón M, Garrido-Ramos MA. Satellite-DNA  
1295 evolutionary patterns under a complex evolutionary scenario: The case of  
1296 *Acrolophus* subgroup (*Centaurea* L., Compositae) from the western Mediterranean.  
1297 *Gene*. 2007;404(1-2):80–92.
- 1298 Talbert PB, Henikoff S. Transcribing centromeres: noncoding RNAs and kinetochore  
1299 assembly. *Trends in Genetics*. 2018;34(8):587–599.
- 1300 Tamura K, Stecher G, Peterson D, Filipski A, Kumar S. MEGA6: molecular  
1301 evolutionary genetics analysis version 6.0. *Molecular biology and evolution*.  
1302 2013;30(12):2725–2729.
- 1303 Teacher AGF, Griffiths DJ. HapStar: automated haplotype network layout and  
1304 visualization. *Mol. Ecol. Resour*. 2011;11:151–153. doi: 10.1111/j.1755-  
1305 0998.2010.02890.x
- 1306 Thompson JD, Gibson TJ, Plewniak F, Jeanmougin F, Higgins DG. The CLUSTAL\_X  
1307 windows interface: flexible strategies for multiple sequence alignment aided by  
1308 quality analysis tools. *Nucleic acids research*. 1997;25(24):4876–4882.
- 1309 Untergasser A, Cutcutache I, Koressaar T, Ye J, Faircloth BC, Remm M, Rozen SG.  
1310 Primer3—new capabilities and interfaces. *Nucleic acids research*.  
1311 2012;40(15):e115
- 1312 Vlahovicek K, Kajan L, Pongor S. DNA analysis servers: plot. it, bend. it, model. it and  
1313 IS. *Nucleic Acids Research*. 2003;31(13):3686–3687.

- 1314 Walsh JB. Persistence of tandem arrays: implications for satellite and simple-sequence  
1315 DNAs. *Genetics*. 1987;115(3):553–567.
- 1316 Waring M, Britten RJ. Nucleotide sequence repetition: A rapidly reassociating fraction  
1317 of mouse DNA. *Science*. 1966;154(3750):791–794.  
1318 <https://doi.org/10.1126/science.154.3750.791>
- 1319 Willard HF, Waye JS. Chromosome-specific subsets of human alpha satellite DNA:  
1320 analysis of sequence divergence within and between chromosomal subsets and  
1321 evidence for an ancestral pentameric repeat. *J Mol Evol*. 1987;25:207–214.  
1322 <https://doi.org/10.1007/BF02100014>
- 1323 Zhang H, Koblížková A, Wang K, Gong Z, Oliveira L, Torres GA, Wu YF, Zhang W,  
1324 Novák P, Buell CR, Macas J, Jiang J. Boom-bust turnovers of megabase-sized  
1325 centromeric DNA in *Solanum* species: rapid evolution of DNA sequences  
1326 associated with centromeres. *The Plant Cell*. 2014;26(4):1436–1447.
- 1327 Zuker M. Mfold web server for nucleic acid folding and hybridization prediction.  
1328 *Nucleic acids research*. 2003;31(13):3406–3415.
- 1329
- 1330
- 1331
- 1332
- 1333
- 1334
- 1335
- 1336
- 1337
- 1338

1339 **Figures and Supplementary Figure**

1340

1341

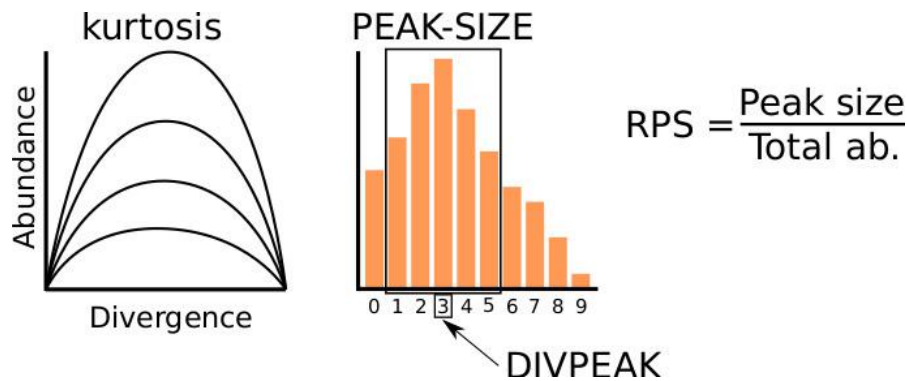

1342

1343

1344

1345

1346

1347

1348

1349

1350

1351

1352

1353

1354

1355

1356

1357

1358

1359

1360

1361

1362

1363

1364

1365

1366

1367

1368

1369

1370

1371

1372

1373

1374

1375

1376

1377

1378

1379

**Figure 1.** Definition of satDNA parameters in respect to abundance and divergence. The distribution of the abundances of groups of sequences differing by 1% divergence constitutes a repeat landscape (RL). It may be seen as a curve (left) or an histogram (right). In addition of variation in kurtosis, represented by several curves on the left, three properties of satDNA can be defined on RLs: DIVPEAK is the divergence class showing the highest abundance (3% in the histogram); PEAK-SIZE is the sum of the abundances of the five classes included around DIVPEAK, thus constituting the sum of all sequences differing by less than 5%, thus coinciding with our definition of satDNA subfamily; RPS is the relative peak size and represents the fraction of abundance which is included in the 5% amplification peak.

a) OSF02

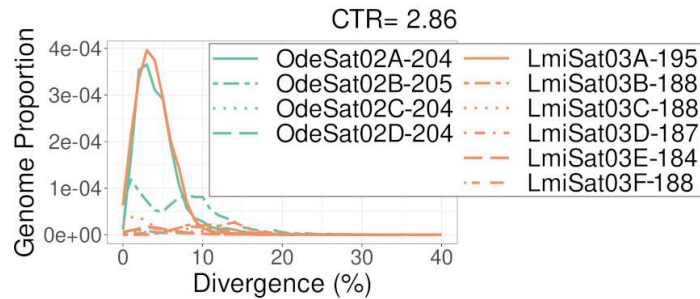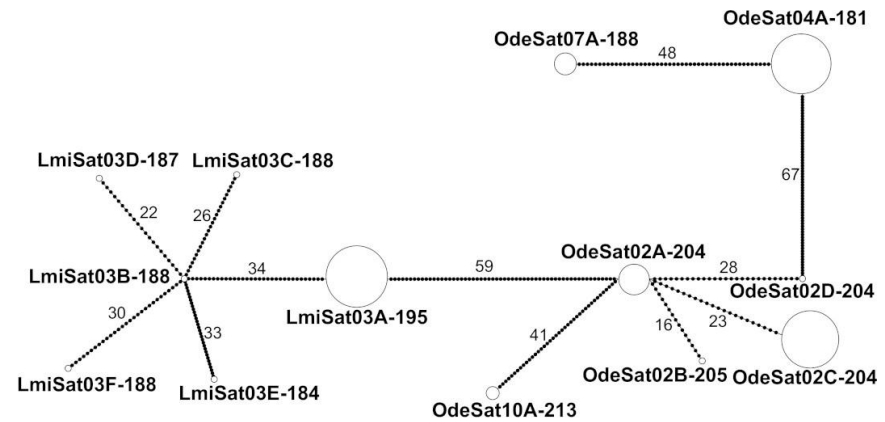

b) OSF12

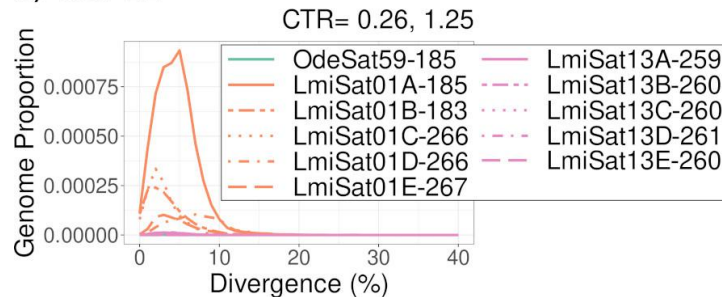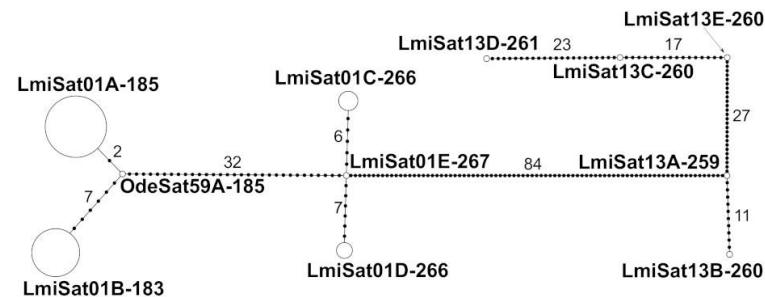

1380  
1381  
1382  
1383  
1384  
1385  
1386  
1387  
1388  
1389

**Figure 2.** Repeat landscape (RL) and minimum spanning tree (MST) of two orthologous superfamilies of satellite DNA in *O. decorus* and *L. migratoria* (OSF02 and OSF12). a) OSF02 showed the highest consensus turnover rate (CTR= 2.86) found among the 20 values estimated between orthologous pairs of families in both species. Note that OSF02 showed large amplification peaks in both species (green curve in *O. decorus* and red curve in *L. migratoria*) and that the MST showed complete separation of OdeSat02 and LmiSat03 sequences. b) OSF12 showed the lowest CTR estimate (0.26 between OdeSat59 and LmiSat01) and the MST (on the right) reveals that the consensus DNA sequences of these two satDNA families showed only two differences. Also note in the RL (on the left) that the OdeSat59 curve is very close to zero, as this is the satDNA family in *O. decorus* showing the lowest abundance, indicating that OSF12 is represented in this species as relict remains which, by chance, almost coincide in consensus sequence with the most abundant subfamily in *L. migratoria* (LmiSat01A), thus evidencing extreme incomplete lineage sorting (see other cases in Fig. S1).



1390

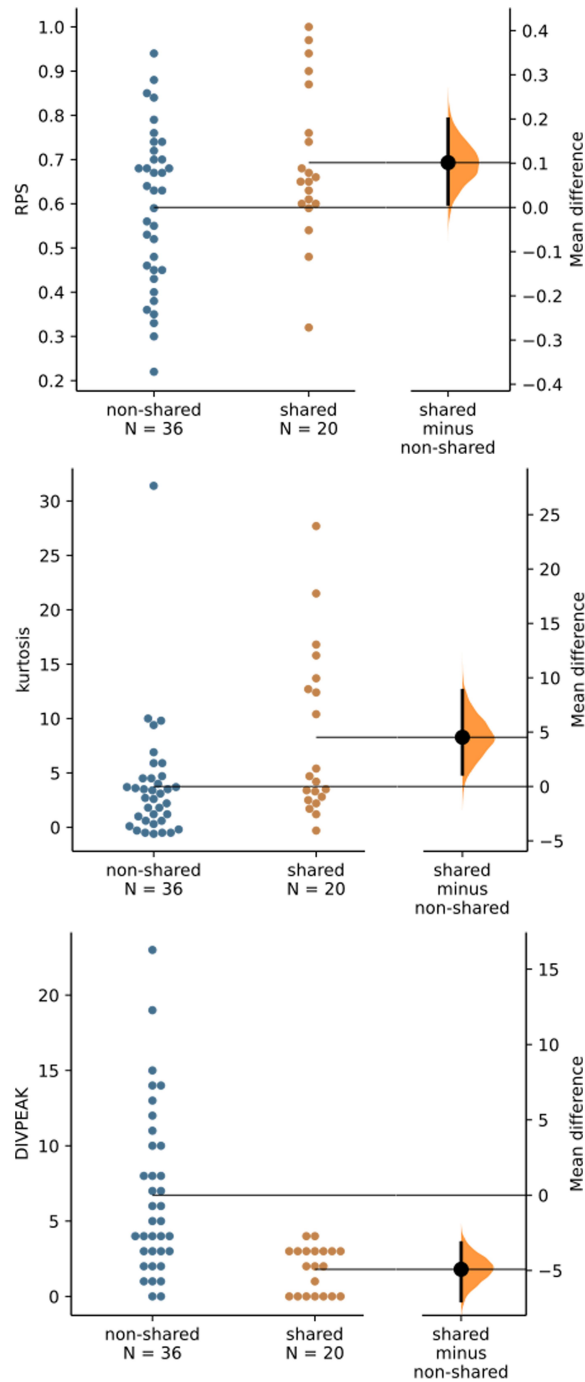

1391  
1392  
1393  
1394  
1395  
1396  
1397  
1398  
1399  
1400  
1401  
1402  
1403

**Figure 3.** Gardner-Altman plots comparing RPS, kurtosis and DIVPEAK between the *L migratoria* satDNA families being shared or non-shared with *O. decorus*. Note that shared satDNAs showed higher homogenization (higher RPS and kurtosis) and lower degeneration (5% effect size for mean difference in DIVPEAK) than non-shared ones, suggesting most recent amplification of the shared ones.

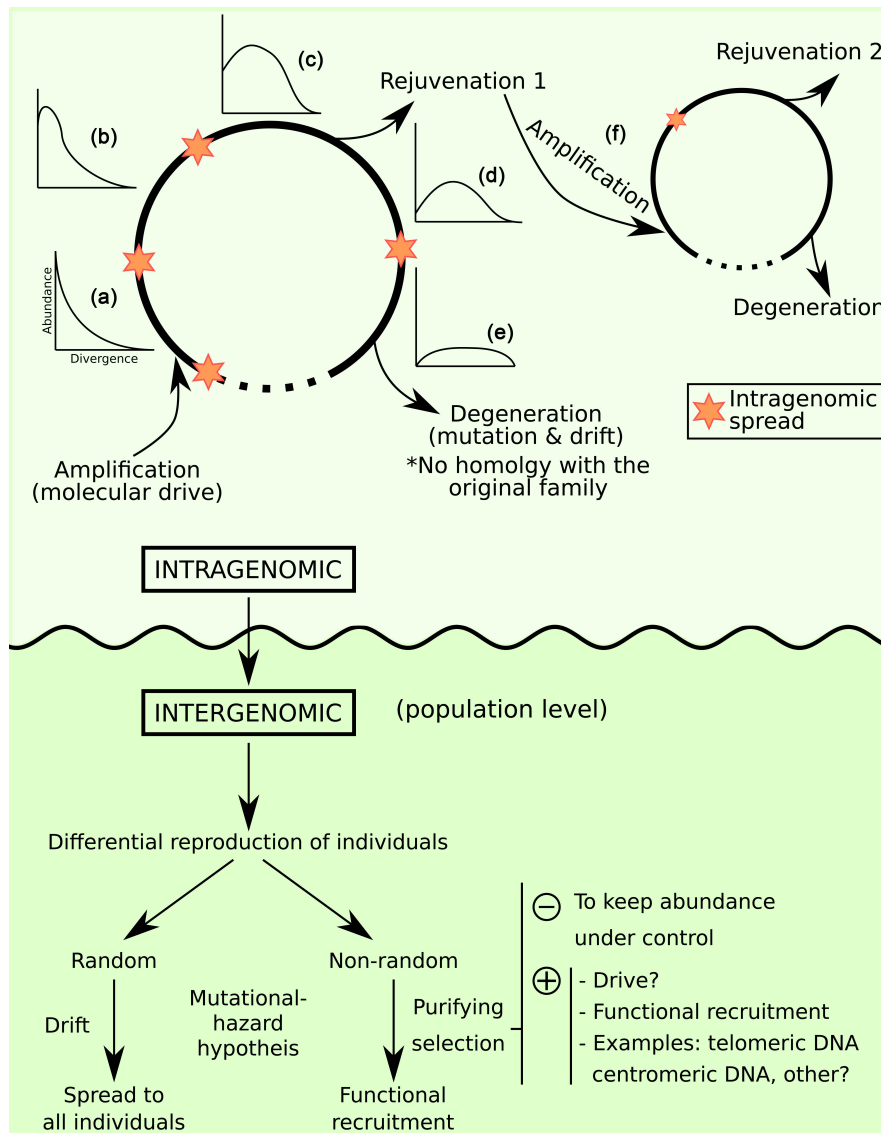

1404  
 1405 **Figure 4.** A model of satDNA evolution. We consider that evolutionary events are  
 1406 rather different at intra- and inter-genomic levels. At intragenomic level, tandem  
 1407 duplication yields many copies of a non-coding sequence which will essentially show  
 1408 the same sequence, thus displaying RLs sharply leptokurtic (a). As time goes by, point  
 1409 mutation increases divergence among the amplified sequences and the curve  
 1410 progressively is flattened (b-e) with increasing DIVPEAK. At any moment of this first  
 1411 amplification-degeneration cycle, another sequence undergoes amplification (f) and  
 1412 begins a cycle of rejuvenation-degeneration, and so on. In parallel, an intragenomic  
 1413 spread of the satDNA can occur at higher or lesser extent. A conceivable exit of these  
 1414 cycles is satDNA degeneration, when homology with the original sequence has been  
 1415 lost. At intergenomic level, individual reproduction will mark the destiny of the  
 1416 different satDNA sequences in populations. When reproduction is differential, albeit  
 1417 random (drift) or non-random (selection), some sequences may become prevalent above  
 1418 others. At this respect, the mutational-hazard hypothesis is applicable to explain the  
 1419 limits to purifying selection in some species showing extremely high abundance of  
 1420 satDNA. Finally, we cannot rule out that, in some case, drive could help satDNA to  
 1421 prosper and, even that positive selection may recruit satDNA for important functions,  
 1422 such as telomeric or centromeric functions.  
 1423

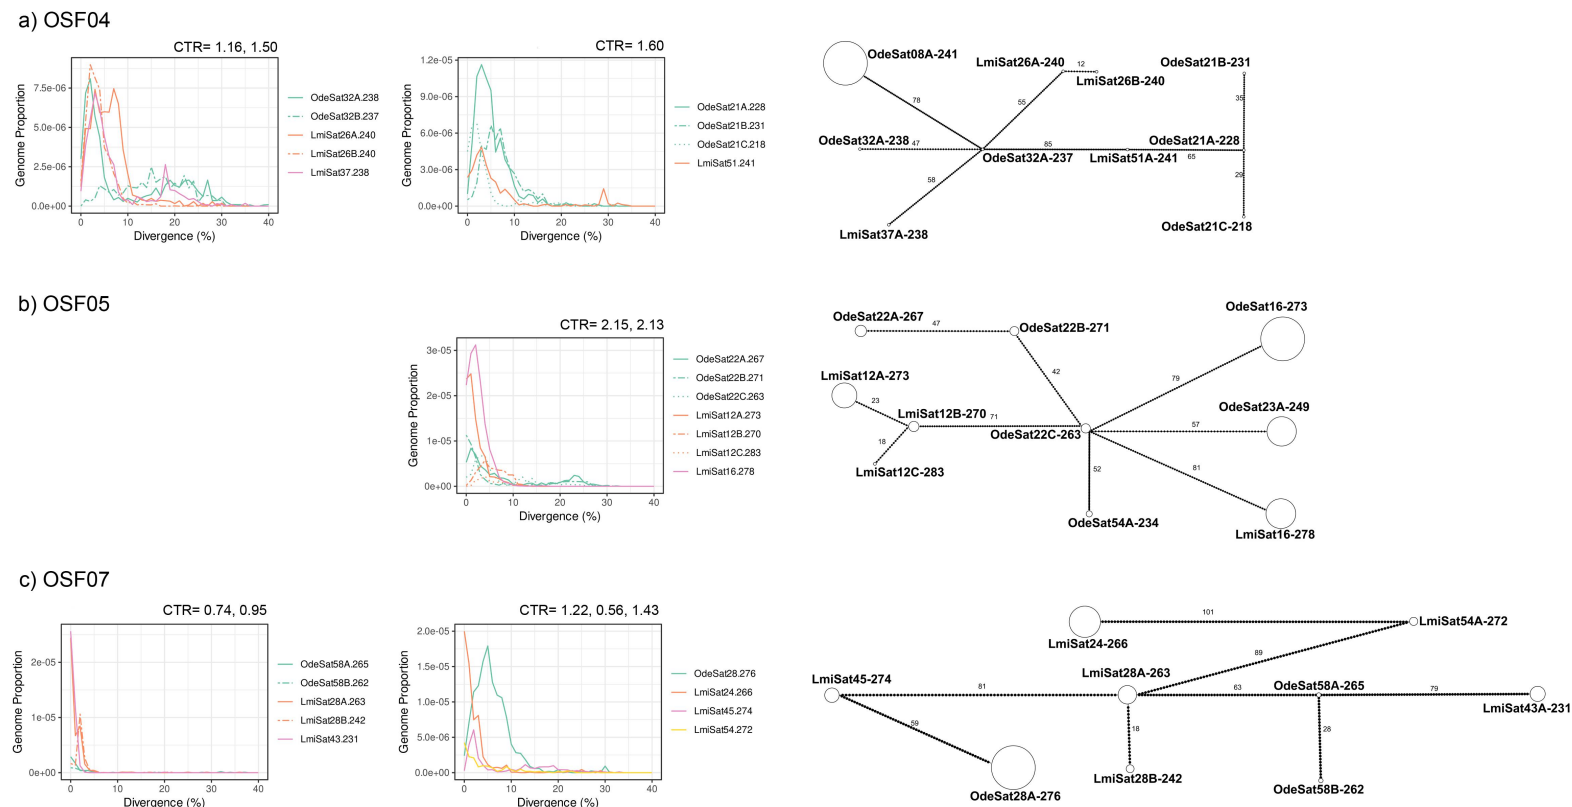

1424  
 1425  
 1426  
 1427  
 1428  
 1429  
 1430  
 1431  
 1432

**Figure S1.** Repeat landscape (RL) and minimum spanning tree (MST) of three orthologous superfamilies of satellite DNA in *O. decorus* and *L. migratoria* (OSF04, OSF05 and OSF07). a) RLs showed that OSF04 showed large peaks of amplification in both species but CTR values ranged between 1.16 and 1.6, presumably due to the incomplete library sorting (ILibS) evidenced by the MST (note how OdeSat32A and LmiSat51A connect with both species' sequences). b) OSF05 showed high CTR values, large amplification peaks in both species and ILibS for only OdeSat22C, which was the only sequence connected with sequences from both species. c) OSF07 showed the lowest CTR values and showed very small amplification peaks for OdeSat58 (green curves in the RL on the left) and higher ILibS, with three sequences being connected with both species' sequences (LmiSat45-274, LmiSat28A-263 and OdeSat58A-265).

1433 **Tables**

1434

**Table 1.** Comparison of satellitome characteristics between *O. decorus* and *L. migratoria* (Southern Lineage), by means of estimation graphics using DABEST (Ho et al. 2019). 95% CI= Confidence interval. RUL= Repeat unit length. \* means that 95% CI does not include the zero value.

| Comparison                  | Item          | Mean (SE)                            |                                         | Effect size              |         |         | Includes zero? |
|-----------------------------|---------------|--------------------------------------|-----------------------------------------|--------------------------|---------|---------|----------------|
|                             |               | <i>O. decorus</i><br>(N= 58)         | <i>L. migratoria</i><br>(N=56)          | Unpaired mean difference | CI_low  | CI_high |                |
| <b>All satDNAs</b>          | RUL           | 201.5 (13.6)                         | 152.7 (14)                              | 48.8                     | 12.1    | 86.6    | *              |
|                             | A+T (%)       | 55.7 (1.2)                           | 54.4 (1.1)                              | 1.27                     | -1.81   | 4.38    |                |
|                             | Abundance (%) | 0.044 (0.013)                        | 0.038 (0.019)                           | 0.0055                   | -0.0557 | 0.0415  |                |
|                             | Divergence    | 7.19 (0.56)                          | 7.09 (0.61)                             | 0.093                    | -1.55   | 1.75    |                |
| <b>Shared satDNAs</b>       |               | <b><i>O. decorus</i><br/>(N= 21)</b> | <b><i>L. migratoria</i><br/>(N= 20)</b> |                          |         |         |                |
|                             | RUL           | 212.8 (12.6)                         | 216.5 (14.1)                            | -3.69                    | -39.4   | 33.3    |                |
|                             | A+T (%)       | 58.3 (1.1)                           | 58.0 (1.1)                              | 0.333                    | -2.8    | 3.27    |                |
|                             | Abundance (%) | 0.071 (0.033)                        | 0.091 (0.052)                           | -0.0196                  | -0.171  | 0.0715  |                |
|                             | Divergence    | 8.08 (1.22)                          | 4.90 (0.50)                             | 3.18                     | 1.19    | 6.34    | *              |
| <b>Non-shared satDNAs</b>   |               | <b><i>O. decorus</i><br/>(N= 37)</b> | <b><i>L. migratoria</i><br/>(N= 36)</b> |                          |         |         |                |
|                             | RUL           | 195.1 (20.2)                         | 117.2 (17.8)                            | 77.9                     | 26.7    | 129     | *              |
|                             | A+T (%)       | 54.2 (1.7)                           | 52.5 (1.6)                              | 1.76                     | -2.75   | 6.21    |                |
|                             | Abundance (%) | 0.028 (0.01)                         | 0.009 (0.002)                           | 0.019                    | 0.00635 | 0.0496  | *              |
|                             | Divergence    | 6.68 (0.53)                          | 8.31 (0.84)                             | -1.63                    | -3.64   | 0.244   |                |
| <b><i>O. decorus</i></b>    |               | <b>Shared<br/>(N= 21)</b>            | <b>Non-shared<br/>(N= 37)</b>           |                          |         |         |                |
|                             | RUL           | 212.8 (12.6)                         | 195.1 (20.2)                            | 17.7                     | -34.4   | 58.3    |                |
|                             | A+T (%)       | 58.3 (1.1)                           | 54.2 (1.7)                              | 4.11                     | 0.299   | 8.19    | *              |
|                             | Abundance (%) | 0.071 (0.033)                        | 0.028 (0.01)                            | 0.0434                   | 0.00243 | 0.139   |                |
|                             | Divergence    | 8.08 (1.22)                          | 6.68 (0.53)                             | 1.4                      | -0.699  | 4.63    |                |
| <b><i>L. migratoria</i></b> |               | <b>Shared<br/>(N= 20)</b>            | <b>Non-shared<br/>(N= 36)</b>           |                          |         |         |                |
|                             | RUL           | 216.5 (14.1)                         | 117.2 (17.8)                            | 99.3                     | 50      | 139     | *              |
|                             | A+T (%)       | 58.0 (1.1)                           | 52.5 (1.6)                              | 5.45                     | 1.95    | 9.43    | *              |
|                             | Abundance (%) | 0.091 (0.052)                        | 0.009 (0.002)                           | 0.082                    | 0.018   | 0.261   | *              |
|                             | Divergence    | 4.90 (0.50)                          | 8.31 (0.84)                             | -3.41                    | -5.42   | -1.59   | *              |

1435

1436

1437

1438

1439

1440

1441

1442

1443

1444

1445

**Table 2.** Characteristics of the orthologous satDNA families analyzed in *O. decorus* (14) and *L. migratoria* (20). Each row includes one Ode and one Lmi satDNA families showing homology between them. Note that some Ode families showed homology with two or three Lmi ones. OSF= Orthologous superfamily, sf= number of subfamilies, FISH= FISH pattern (B= banded, NS= no signal), abun= abundance (% of the genome), RPS= Relative peak size, DP= DIVPEAK, MAL= Maximum array length observed in Minlon reads of *L. migratoria*, CEI= Concerted evolution index (L= *L. migratoria*, O= *O. decorus*), Intid= Interspecific sequence identity (%), Intdiv= Interspecific divergence, CTR= Consensus turnover rate, ILibS= Incomplete library sorting. Negative CEI values and Int\_id>95% are remarked in bold type letter. See Table S4 to complete data with repeat unit length, A+T content, divergence (%), peak size, kurtosis of the repeat landscape, tandem structure index and Gibbs free energy of the secondary structure.

| <i>O. decorus</i> |              |    |      |         |     |    | <i>Locusta migratoria</i> |    |      |         |      |    |       | Interspecific comparisons |             |             |         |       |       |     |
|-------------------|--------------|----|------|---------|-----|----|---------------------------|----|------|---------|------|----|-------|---------------------------|-------------|-------------|---------|-------|-------|-----|
| OSF               | Name         | sf | FISH | abun    | RPS | DP | Name                      | sf | FISH | abun    | RPS  | DP | MAL   | CEI_O                     | CEI_L       | Int_id      | Int_div | CTR   | ILibS |     |
| 1                 | OdeSat01-287 | 1  | B    | 6.2E-03 | 87% | 1  | LmiSat09-181              | 5  | B    | 3.0E-04 | 65%  | 0  | 4417  | 88.4                      | 85.6        | 68.9        | 90.8    | 1.990 | 0.30  |     |
| 2                 | OdeSat02-204 | 4  | B    | 3.3E-03 | 51% | 2  | LmiSat03-195              | 6  | B    | 3.0E-03 | 63%  | 3  | 13447 | 124.5                     | 125.1       | 60.6        | 130.4   | 2.858 | 0     |     |
| 3                 | OdeSat17-176 | 1  | NS   | 2.0E-04 | 29% | 27 | LmiSat02-176              | 1  | B    | 3.6E-03 | 68%  | 4  | 20180 | <b>-24.6</b>              | <b>-5.1</b> | <b>99.4</b> | 0.6     | 0.013 | 1.00  |     |
| 4                 | OdeSat21-228 | 3  | NS   | 1.5E-04 | 58% | 3  | LmiSat51-241              | 1  | B    | 2.9E-05 | 61%  | 3  | 1708  | 67.0                      | 66.5        | 71.8        | 72.8    | 1.596 | 0.44  |     |
| 4                 | OdeSat32-238 | 2  | B    | 8.5E-05 | 36% | 2  | LmiSat26-240              | 2  | B    | 1.0E-04 | 60%  | 3  | 1455  | 40.5                      | 47.8        | 77.7        | 53.1    | 1.164 | 0.59  |     |
| 4                 |              |    |      |         |     |    | LmiSat37-238              | 1  | B    | 4.6E-05 | 59%  | 3  | 2454  | 54.4                      | 59.5        | 75.6        | 67      | 1.469 | 0.49  |     |
| 5                 | OdeSat22-267 | 3  | B    | 1.4E-04 | 59% | 1  | LmiSat12-273              | 3  | B    | 1.3E-04 | 74%  | 1  | 2948  | 90.6                      | 94.8        | 75          | 98.1    | 2.150 | 0.25  |     |
| 5                 |              |    |      |         |     |    | LmiSat16-278              | 1  | B    | 1.4E-04 | 87%  | 2  | 1965  | 89.5                      | 94.6        | 72.6        | 97      | 2.126 | 0.26  |     |
| 6                 | OdeSat26-180 | 1  | B    | 1.3E-04 | 88% | 2  | LmiSat41-180              | 1  | B    | 5.1E-05 | 94%  | 3  | 515   | 29.2                      | 28.2        | 74.4        | 31.7    | 0.695 | 0.76  |     |
| 7                 | OdeSat28-276 | 1  | B    | 1.2E-04 | 56% | 5  | LmiSat24-266              | 1  | NS   | 5.9E-05 | 90%  | 0  | 1378  | 49.4                      | 53.4        | 67.9        | 55.8    | 1.223 | 0.57  |     |
| 7                 |              |    |      |         |     |    | LmiSat45-274              | 1  | B    | 2.5E-05 | 54%  | 2  | 945   | 19.0                      | 16.8        | 79.7        | 25.4    | 0.557 | 0.81  |     |
| 7                 |              |    |      |         |     |    | LmiSat54-272              | 1  | B    | 1.6E-05 | 65%  | 0  | 2073  | 58.7                      | 60.2        | 66.3        | 65.1    | 1.427 | 0.50  |     |
| 7                 | OdeSat58-265 | 2  | NS   | 9.5E-06 | 88% | 0  | LmiSat28-263              | 2  | B    | 6.0E-05 | 97%  | 0  | 2821  | 30.1                      | 32.4        | 77.5        | 33.9    | 0.743 | 0.74  |     |
| 7                 |              |    |      |         |     |    | LmiSat43-231              | 1  | B    | 3.9E-05 | 100% | 0  |       | 39.3                      | 42.7        | 69.3        | 43.1    | 0.945 | 0.67  |     |
| 8                 | OdeSat39-185 | 2  | NS   | 6.8E-05 | 67% | 4  | LmiSat06-185              | 4  | B    | 4.9E-04 | 66%  | 3  | 19168 | 14.9                      | 16.1        | 84.3        | 21      | 0.460 | 0.84  |     |
| 9                 | OdeSat41-75  | 1  | NS   | 6.1E-05 | 29% | 18 | LmiSat27-57               | 1  | NS   | 5.4E-05 | 32%  | 0  | 712   | <b>-2.4</b>               | 7.1         | 92.7        | 16.2    | 0.355 | 0.88  |     |
| 10                | OdeSat56-249 | 1  | NS   | 2.0E-05 | 93% | 0  | LmiSat32-261              | 1  | B    | 3.9E-05 | 60%  | 0  | 1489  | 31.5                      | 26.4        | 77.2        | 32.9    | 0.721 | 0.75  |     |
| 11                | OdeSat57-75  | 1  | NS   | 1.4E-05 | 40% | 4  | LmiSat17-75               | 1  | B    | 1.2E-04 | 48%  | 2  | 3194  | <b>-1.3</b>               | 2.7         | 92          | 8.5     | 0.186 | 0.93  |     |
| 12                | OdeSat59-185 | 1  | NS   | 5.8E-06 | 36% | 3  | LmiSat01-185              | 5  | B    | 9.8E-03 | 46%  | 3  | 17619 | <b>-0.9</b>               | 7.2         | <b>98.9</b> | 11.8    | 0.259 | 0.91  |     |
| 12                |              |    |      |         |     |    | LmiSat13-259              | 5  | B    | 1.5E-04 | 76%  | 4  | 1379  | 44.1                      | 52.3        | 63.3        | 56.8    | 1.245 | 0.56  |     |
|                   |              |    |      |         |     |    |                           |    |      |         |      |    |       |                           |             | <b>Mean</b> | 77.3    | 50.6  | 1.109 | 61% |
|                   |              |    |      |         |     |    |                           |    |      |         |      |    |       |                           |             | <b>SD</b>   | 11.1    | 34.7  | 0.76  | 27% |
|                   |              |    |      |         |     |    |                           |    |      |         |      |    |       |                           |             | <b>CV</b>   | 14%     | 69%   | 69%   | 44% |

1448

**Table 3.** Spearman rank correlation (rS) between satellitome characteristics in *Oedaleus decorus* (Ode) and *Locusta migratoria* (Lmi). Pb= Sequential Bonferroni correction. RUL= Repeat unit length, TSI= Tandem structure index. RPS= Relative peak size.

| Ode                    | Ode (N=58)   |        |         |                | Lmi (N= 56)  |        |         |                |
|------------------------|--------------|--------|---------|----------------|--------------|--------|---------|----------------|
|                        | rS           | t(N-2) | P       | Pb             | rS           | t(N-2) | P       | Pb             |
| Divergence & RUL       | -0.29        | -2.23  | 3.0E-02 | 3.6E-01        | -0.39        | -3.07  | 3.4E-03 | <b>4.7E-02</b> |
| Divergence & A+T (%)   | -0.20        | -1.51  | 1.4E-01 | 1.4E+00        | -0.11        | -0.83  | 4.1E-01 | 2.9E+00        |
| Divergence & subfam    | 0.02         | 0.18   | 8.6E-01 | 8.6E-01        | -0.04        | -0.27  | 7.9E-01 | 7.9E-01        |
| Divergence & TSI       | -0.56        | -5.11  | 4.0E-06 | <b>6.0E-05</b> | -0.26        | -1.94  | 5.7E-02 | 6.9E-01        |
| Divergence & Abundance | 0.03         | 0.19   | 8.5E-01 | 2.5E+00        | -0.24        | -1.83  | 7.2E-02 | 7.9E-01        |
| Divergence & RPS       | <b>-0.89</b> | -14.91 | 3.8E-21 | <b>6.5E-20</b> | <b>-0.90</b> | -15.09 | 5.1E-21 | <b>8.7E-20</b> |
| RPS & RUL              | 0.14         | 1.05   | 3.0E-01 | 2.4E+00        | 0.31         | 2.38   | 2.1E-02 | 2.7E-01        |
| RPS & A+T (%)          | 0.10         | 0.76   | 4.5E-01 | 2.7E+00        | 0.05         | 0.39   | 7.0E-01 | 2.8E+00        |
| RPS & subfam           | -0.02        | -0.19  | 8.5E-01 | 1.7E+00        | 0.04         | 0.28   | 7.8E-01 | 1.6E+00        |
| RPS & TSI              | 0.58         | 5.32   | 1.9E-06 | <b>3.0E-05</b> | 0.21         | 1.59   | 1.2E-01 | 1.2E+00        |
| RPS & Abundance        | -0.14        | -1.03  | 3.1E-01 | 2.2E+00        | 0.11         | 0.85   | 4.0E-01 | 3.2E+00        |
| RPS & DIVPEAK          | <b>-0.53</b> | -4.74  | 1.5E-05 | <b>2.0E-04</b> | <b>-0.63</b> | -5.98  | 1.8E-07 | <b>2.9E-06</b> |
| DIVPEAK & RUL          | <b>-0.55</b> | -4.99  | 6.2E-06 | <b>8.6E-05</b> | <b>-0.52</b> | -4.47  | 4.0E-05 | <b>6.0E-04</b> |
| DIVPEAK & A+T (%)      | -0.20        | -1.55  | 1.3E-01 | 1.4E+00        | -0.10        | -0.75  | 4.6E-01 | 2.7E+00        |
| DIVPEAK & subfam       | -0.07        | -0.50  | 6.2E-01 | 3.1E+00        | 0.05         | 0.33   | 7.4E-01 | 2.2E+00        |
| DIVPEAK & TSI          | -0.05        | -0.40  | 6.9E-01 | 2.8E+00        | 0.07         | 0.53   | 6.0E-01 | 3.0E+00        |
| DIVPEAK & Abundance    | 0.17         | 1.29   | 2.0E-01 | 1.8E+00        | -0.13        | -0.99  | 3.2E-01 | 2.9E+00        |

1449

1450

1451

1452

1453

1454

1455

1456

1457

1458

**Table 4.** Stepwise multiple regression of CTR, estimated from 14 orthologous pairs of satDNA families, on four satellitome features of *L. migratoria* (Lmi) and *O. decorus* (Ode). In each species, the independent variables employed were the number of subfamilies (subfam), the number of repeat units included in amplification peaks (peak\_copies), the tandem structure index (TSI) and the homogenization index (RPS). Note that only three independent variables entered in the model, all of them corresponding to Ode, and only two (Ode\_subfam and Ode\_peak\_copies) were associated with significant increases in explained variance in CTR (56.4% and 25.7%, respectively). The multiple correlation coefficients were 0.652 (SE= 0.13) and 0.466 (SE= 0.127), respectively. The Shapiro-Wilks test showed that the standardized residuals of this regression fitted a normal distribution ( $W= 0.966$ ,  $P= 0.821$ ). VIF= Variance inflation factors. Redundancy  $r^2$  was performed between each independent item and the seven remaining, in order to calculate VIF as  $1/(1-r^2)$ .

| Item            | Redundancy $r^2$ | VIF  | Step | Multiple r | Multiple $r^2$ | $r^2$ increase | F     | P      | Partial r |
|-----------------|------------------|------|------|------------|----------------|----------------|-------|--------|-----------|
| Lmi_subfam      | 0.668            | 3.01 |      |            |                |                |       |        |           |
| Lmi_peak_copies | 0.262            | 1.36 |      |            |                |                |       |        |           |
| Lmi_TSI         | 0.331            | 1.50 |      |            |                |                |       |        |           |
| Lmi_RPS         | 0.236            | 1.31 |      |            |                |                |       |        |           |
| Ode_subfam      | 0.118            | 1.13 | 1    | 0.751      | 0.564          | <b>0.564</b>   | 15.54 | 0.0020 | 0.845     |
| Ode_peak_copies | 0.067            | 1.07 | 2    | 0.906      | 0.822          | <b>0.257</b>   | 15.89 | 0.0021 | 0.758     |
| Ode_TSI         | 0.172            | 1.21 | 3    | 0.922      | 0.850          | <b>0.028</b>   | 1.89  | 0.1995 | 0.398     |
| Ode_RPS         | 0.565            | 2.30 |      |            |                |                |       |        |           |

1459
